# Supplementary material for: Cross-Population Analysis of Breast CancerTranscriptomics: Comparative Insights Between Caucasian and Indian Patients
Source: Research Square preprint supplement (doi:10.21203/rs.3.rs-4701356/v2), 2025-02-20
Supplement: Supplementary file 1 [file 17b29f42f272b285114cb05d.docx]

**Supplementary information-1**

**Cross-Population Analysis of Breast Cancer Transcriptomics: Comparative Insights Between Caucasian and Indian Patients**

Dipannita Ghosh1, Srinivas Bandaru2, Ishita Chopra1,3, Arshiya Khan1,4,5, Khushboo Sharma1,4,5, Anushka Bhardwaj1,4,5, Manmeet Kaur1, Umesh Panwar1,5, Sanjeev Kumar Singh5, Anuraj Nayarisseri1,4*

*Corresponding author email: anuraj@eminentbio.com

1. In silico Research Laboratory, Eminent Biosciences, 91-A, Sector A, Mahalakshmi Nagar, Indore - 452010, Madhya Pradesh, India.

2. Department of Biotechnology, Koneru Lakshmiah Educational Foundation (KLEF), Green Fields, Vaddeswaram, Andhra Pradesh 522302.

3. School of Medicine and Health Sciences, The George Washington University, Ross Hall, 2300 Eye Street, NW Washington, D.C. - 20037, USA.

4. Bioinformatics Research Laboratory, LeGene Biosciences Pvt Ltd, 91-A, Sector A, Mahalakshmi Nagar, Indore - 452010, Madhya Pradesh, India.

5. Computer-Aided Drug Designing and Molecular Modeling Lab, Department of Bioinformatics, Alagappa University, Karaikudi-630003, Tamil Nadu, India.

**Supplementary Table 1.** Sample information with sequencing details

| **Run** | **Average spot length** | **Bases-giga basepairs** | **Size** | **Histology** | **Date Published** | **Access Type** | **Age** | **CTC presence** | **CTC phenotype** | **t_stage** | **tumour_grade** |
| --- | --- | --- | --- | --- | --- | --- | --- | --- | --- | --- | --- |
| SRR19262411 | 150 | 8.56Gbp | 3.5Gb | PBC | 30-06-2022 | Public | 63 | CTC- | NA | 2 | low/intermediate |
| SRR19262412 | 150 | 6.66Gbp | 2.5Gb | PBC | 30-06-2022 | Public | 40 | CTC+ | EMT+/EP+ | 1 | low/intermediate |
| SRR19262413 | 150 | 8.36Gbp | 3.4Gb | PBC | 30-06-2022 | Public | 49 | CTC- | NA | 1 | high |
| SRR19262414 | 150 | 9.01Gbp | 3.8Gb | PBC | 30-06-2022 | Public | 77 | CTC- | NA | 2 | high |
| SRR19262415 | 150 | 7.72Gbp | 3.2Gb | PBC | 30-06-2022 | Public | 57 | CTC- | NA | 1 | high |
| SRR19262416 | 150 | 8.04Gbp | 3.3Gb | PBC | 30-06-2022 | Public | 76 | CTC+ | EMT+ | 2 | high |
| SRR19262417 | 150 | 7.92Gbp | 3.1Gb | PBC | 30-06-2022 | Public | 59 | CTC+ | EMT+ | 1 | high |
| **SRR19262418** | **150** | **7.32Gbp** | **2.8Gb** | **Healthy** | **30-06-2022** | **Public** | **40** | **NA** | **NA** | **NA** |  |
| SRR19262419 | 150 | 7.51Gbp | 2.8Gb | PBC | 30-06-2022 | Public | 56 | CTC+ | EMT+ | 2 | low/intermediate |
| SRR19262420 | 150 | 5.33Gbp | 2Gb | PBC | 30-06-2022 | Public | 79 | CTC+ | EMT+/EP+ | 1 | low/intermediate |
| SRR19262421 | 150 | 4.76Gbp | 1.8Gb | PBC | 30-06-2022 | Public | 62 | CTC+ | EP+ | 1 |  |
| SRR19262422 | 150 | 7.33Gbp | 2.8Gb | PBC | 30-06-2022 | Public | 63 | CTC+ | EMT+ | 1 | low/intermediate |
| **SRR19262423** | **150** | **5.92Gbp** | **2.3Gb** | **Healthy** | **30-06-2022** | **Public** | **45** | **NA** | **NA** | **NA** |  |
| SRR19262424 | 150 | 6.16Gbp | 2.4Gb | PBC | 30-06-2022 | Public | 41 | CTC- | NA | 1 | high |
| SRR19262425 | 150 | 7.19Gbp | 2.8Gb | PBC | 30-06-2022 | Public | 67 | CTC- | NA | 1 | low/intermediate |
| **SRR19262426** | **150** | **11.47Gbp** | **4.4Gb** | **Healthy** | **30-06-2022** | **Public** | **50** | **NA** | **NA** | **NA** |  |
| **SRR19262427** | **150** | **8.37Gbp** | **3.1Gb** | **Healthy** | **30-06-2022** | **Public** | **39** | **NA** | **NA** | **NA** |  |
| **SRR19262428** | **150** | **7.20Gbp** | **2.8Gb** | **Healthy** | **30-06-2022** | **Public** | **44** | **NA** | **NA** | **NA** |  |
| SRR19262429 | 150 | 8.49Gbp | 3.3Gb | PBC | 30-06-2022 | Public | 48 | CTC- | NA | 1 | high |
| SRR19262430 | 150 | 6.57Gbp | 2.6Gb | PBC | 30-06-2022 | Public | 27 | CTC- | NA | 2 | high |
| SRR19262431 | 150 | 7.64Gbp | 3.0Gb | PBC | 30-06-2022 | Public | 52 | CTC- | NA | 1 | low/intermediate |
| SRR19262432 | 150 | 8.14Gbp | 3.4Gb | PBC | 30-06-2022 | Public | 60 | CTC+ | EMT+ | 2 | high |
| SRR19262433 | 150 | 9.08Gbp | 3.7Gb | PBC | 30-06-2022 | Public | 61 | CTC+ | EMT+/EP+ | 1 | high |

**Supplementary Table 2.** FastQC report statistics of samples

| **Sample No.** | **total sequences per .fastq file** | **Mean Phred Score** | **Mean GC Content** | **Per Base N Content** |
| --- | --- | --- | --- | --- |
| SRR19262411 | 57085931 | 32-40 | 44 | Nil |
| SRR19262412 | 44404313 | 30-38 | 46 | Nil |
| SRR19262413 | 55727923 | 32-38 | 48 | Nil |
| SRR19262414 | 60059706 | 29-40 | 46 | Nil |
| SRR19262415 | 51441165 | 32-40 | 49 | Nil |
| SRR19262416 | 53571028 | 31-40 | 53 | Nil |
| SRR19262417 | 52831389 | ‘34-40 | 45 | Nil |
| **SRR19262418** | **48814166** | **32-40** | **52** | **Nil** |
| SRR19262419 | 50051105 | 32-40 | 49 | Nil |
| SRR19262420 | 35545774 | 32-40 | 48 | Nil |
| SRR19262421 | 31753765 | 34-40 | 45 | Nil |
| SRR19262422 | 48851400 | 32-40 | 46 | Nil |
| **SRR19262423** | **39479614** | **31-38** | **56** | **Nil** |
| SRR19262424 | 41082708 | 32-36 | 50 | Nil |
| SRR19262425 | 47932624 | 32-40 | 47 | Nil |
| **SRR19262426** | **76483229** | **32-40** | **48** | **Nil** |
| **SRR19262427** | **55798258** | **34-40** | **47** | **Nil** |
| **SRR19262428** | **47981509** | **32-40** | **47** | **Nil** |
| SRR19262429 | 56619362 | 30-38 | 48 | Nil |
| SRR19262430 | 43799196 | 32-40 | 50 | Nil |
| SRR19262431 | 50933300 | 34-40 | 48 | Nil |
| SRR19262432 | 54279367 | 32-40 | 48 | Nil |
| SRR19262433 | 60533865 | 32-40 | 46 | Nil |
|  |  |  |  |  |

**Legend**

**
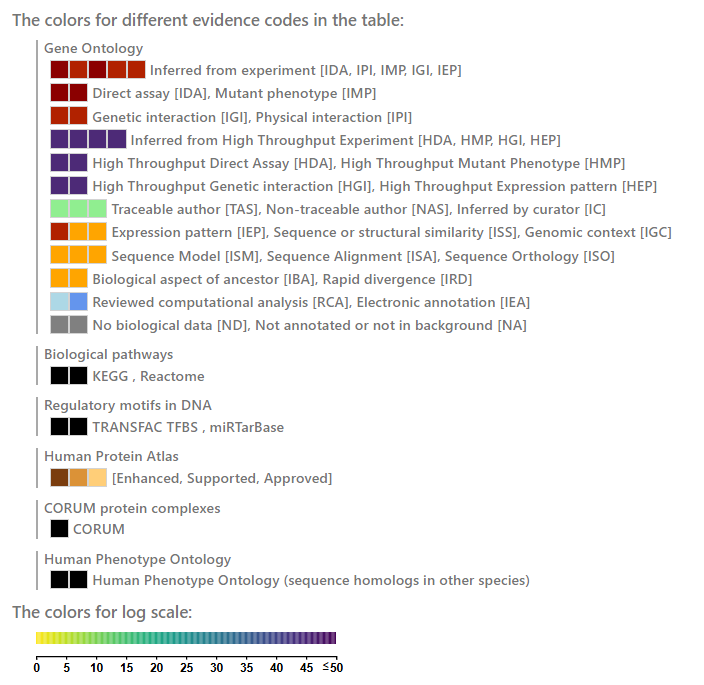

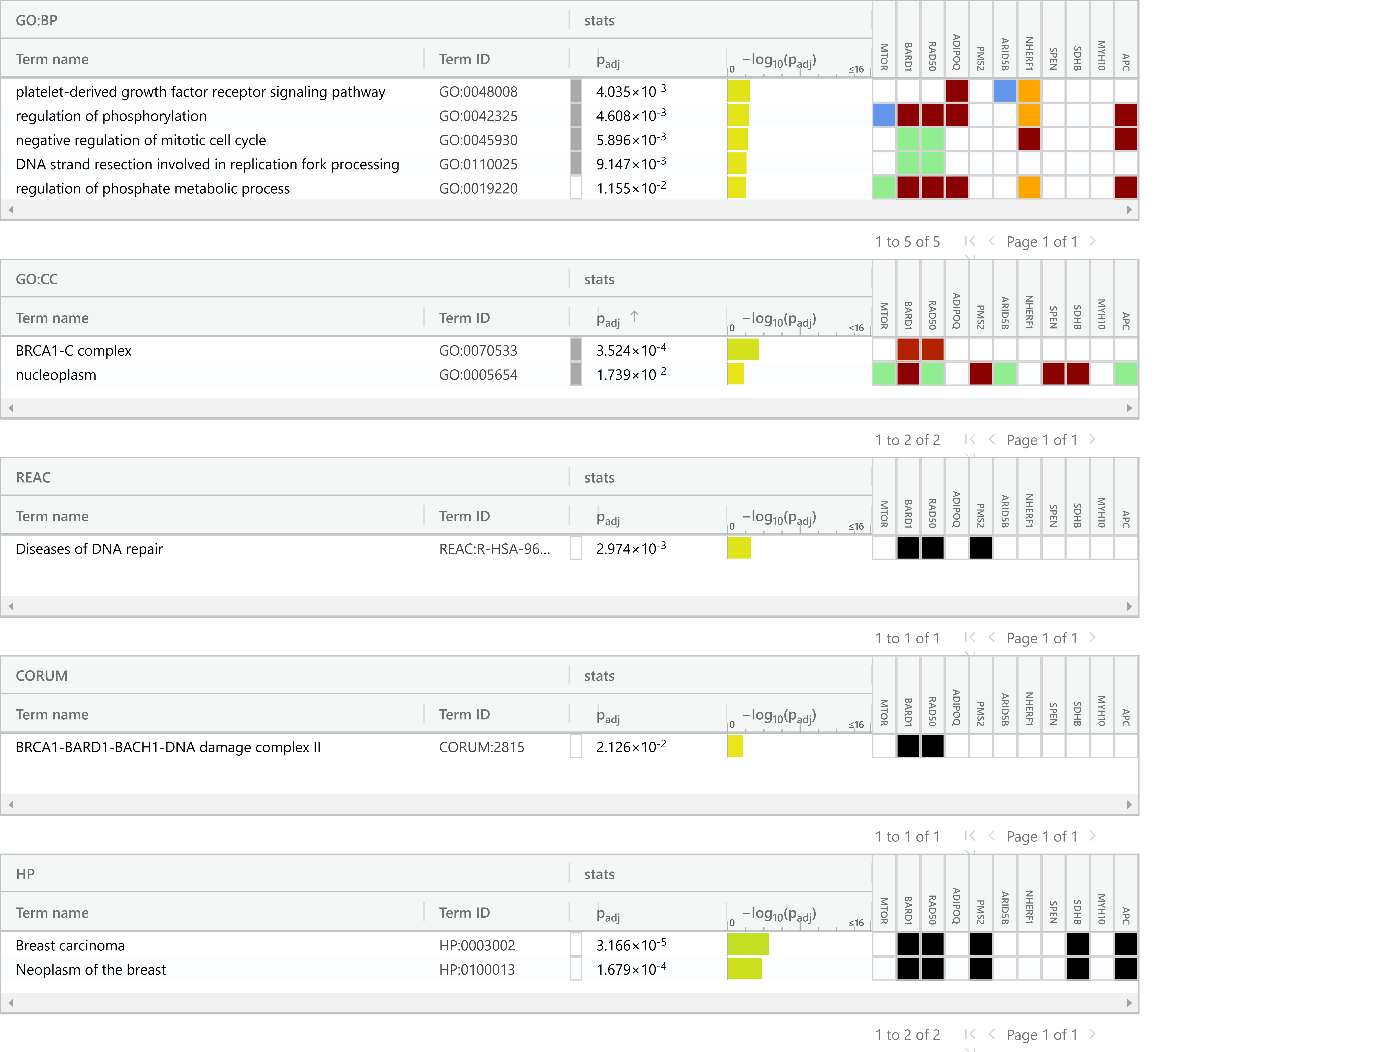
**

**Supplementary figure 1**. Gene Ontology report generated by Gprofiler with enriched genes mTOR, BARD1, RAD50, ADIPOQ, PMS2, ARID5B, NHERF1, SPEN, SDHB, MYH10 and APC.


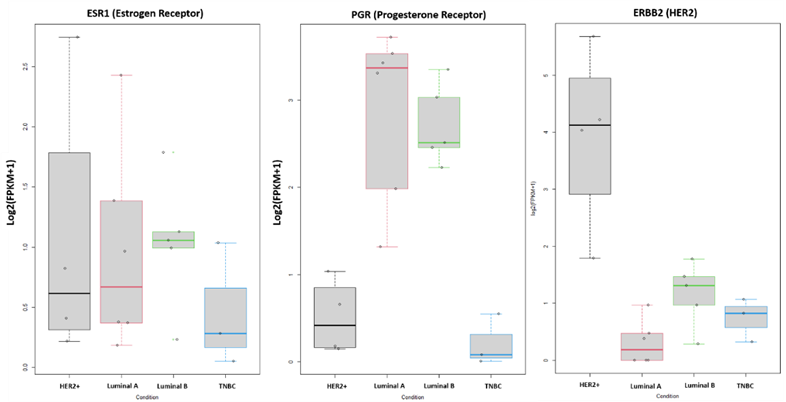


**Supplementary figure 2.** **Expression of hormone receptors in histological classification of breast cancer.** Luminal B-type cancers exhibit elevated ESR1 expression in comparison to luminal A and HER2-enriched tumours. In contrast, both luminal-A and -B tumours exhibited higher PGR levels than HER2-enriched tumours. HER2-enriched tumours exhibit notably high ERBB2 transcript levels, which were markedly lower in luminal A-type and luminal B-type tumours. Triple-negative breast cancer (TNBC) tumours exhibit reduced levels of all three proteins—ESR1, PGR, and HER2—compared to those of other classes in immunohistological subtype.
