# Supplementary material for: Cross-Population Analysis of Breast CancerTranscriptomics: Comparative Insights Between Caucasian and Indian Patients
Source: Research Square preprint supplement (doi:10.21203/rs.3.rs-4701356/v2), 2025-02-20
Supplement: Supplementary file 2 [file 5237e6ab5d60cb4da8608b9d.xlsx]

## Sheet: qRT PCR PRIMERS
Gene	Transcript ID		Sequence	Start	Length	Tm	GC Percent	Amplicon size
ADIPOQ	NM_001177800.2	Forward Primer	GAACTCCTGACCTTGTGATCTG	2751	22	62	50	93
		Reverse Primer	CTCACCTCTTCATCCCTCTCTA	2843	22	61	50
APC	NM_000038.6	Forward Primer	ACGAGCACAGCGAAGAATAG	695	20	62	50	204
		Reverse Primer	GAACCCTGACCATTACCAGAAG	898	22	62	50
ARIBD5	NM_032199.3	Forward Primer	GATGGAGCCCAACTCACTCC	11	20	60	60	174
		Reverse Primer	TGGAGCTCCGCTATGCAAAT	184	20	59	50
MYH10	NM_001256012.3	Forward Primer	CGGGACAGCAAGACAAAGATA	1086	21	62	47	824
		Reverse Primer	CAGCCACTCATCTGCCTTATAG	1909	22	62	50
PMS2	NM_000535.7	Forward Primer	CTCAGGAGAAAGCGCCTAAA	1634	20	62	50	101
		Reverse Primer	GTTGAGAGTCTGAGGTGCTATG	2199	22	62	50
RAD50	NM_005732.4	Forward Primer	GCTTGGTCACTCCCTCTTATTT	6573	22	62	45	122
		Reverse Primer	GAGAGGCCAAGGAGTTGTATTAG	6694	23	62	47
SDHB	NM_001407361.1	Forward Primer	GTCCATAGAAGAGCGTGAGAAA	475	22	61	45	215
		Reverse Primer	GGCAGCGGTATAGAGAGAATG	689	21	61	52
NHERF1	NM_004252.5	Forward Primer	CAGATGGACTGGAGCAAGAAA	1252	21	62	47	210
		Reverse Primer	CCCTAAAGTCAGGGAAGAACATAG	1461	24	62	45
SPEN	NM_015001.3	Forward Primer	CGGAATGTAAGGAGCGTCTATG	6065	22	62	50	108
		Reverse Primer	CTCTCGCTCCAATCTCTTTCTG	6172	22	62	50
mTOR	NM_001386500.1	Forward Primer	CACCCATCCAACCTGATGCT	7139	22	60	55	199
		Reverse Primer	CCTCCATCACTGTGTGGCAT	7337	22	60	55
BARD 1	NM_000465.4	Forward Primer	CCAGACACTAAGAGCAGGAATG	979	22	62	50	357
		Reverse Primer	CACTCGCCTGTAACTTGAACTA	1335	22	61	45
