# Supplementary material for: Cross-Population Analysis of Breast CancerTranscriptomics: Comparative Insights Between Caucasian and Indian Patients
Source: Research Square preprint supplement (doi:10.21203/rs.3.rs-4701356/v2), 2025-02-20
Supplement: Supplementary file 3 [file dfec3858171cafcb9ab0d7ee.xlsx]

## Sheet: mTOR
Sample Name		Target Name (Endogenous Control)	Cт Value (Duplicate)		Cт Mean (GAPDH)	Target Name (Gene of Interest)	Cт Value (Duplicate)		Cт Mean (LAG3)	Fold Change Calculation (FC=2^-ΔΔCt)
	Immunochemistry									ΔCt	ΔΔCt	Fold Change					Healthy Tissue	BC Tissue
Control 1	Luminal A	GAPDH	16.8814	17.3532	17.1173	MTOR	17.865	17.6525	17.7588	0.641491	-0.480894	1.39561				AVERAGE	1.05655	2.30253
Control 2	Luminal A	GAPDH	16.5975	17.109	16.8532	MTOR	17.4591	17.2059	17.3325	0.479282	-0.643103	1.56168				SD	0.320734	0.796938
Control 3	Luminal A	GAPDH	16.7268	17.4273	17.077	MTOR	17.9048	17.7431	17.824	0.746961	-0.375424	1.29722				SE	0.101425	0.252014
Control 4	Luminal A	GAPDH	17.2815	16.296	16.7887	MTOR	18.5334	18.0381	18.2857	1.49703	0.374647	0.771294				average of delta Ct of Control		1.12238
Control 5	Luminal A	GAPDH	16.0862	16.5104	16.2983	MTOR	17.6603	17.2543	17.4573	1.15898	0.0365966	0.974952
Control 6	Luminal A	GAPDH	16.8794	16.3637	16.6216	MTOR	18.151	18.6262	18.3886	1.76707	0.644682	0.639634
Control 7	Luminal A	GAPDH	16.0861	16.6104	16.3482	MTOR	17.6609	17.2543	17.4576	1.10936	-0.0130214	1.00907
Control 8	Luminal A	GAPDH	16.8978	16.657	16.7774	MTOR	18.5359	17.9285	18.2322	1.45481	0.33242	0.794203
Control 9	Luminal A	GAPDH	16.9794	16.6637	16.8216	MTOR	18.1511	18.6262	18.3887	1.5671	0.444716	0.734729
Control 10	Luminal A	GAPDH	17.2715	16.296	16.7837	MTOR	18.6978	18.0081	18.3529	1.56923	0.446846	0.733645
Control 11	Luminal B	GAPDH	18.0826	16.9429	17.5128	MTOR	18.4807	19.1018	18.7912	1.27845	0.156063	0.897471
Control 12	Luminal B	GAPDH	18.0067	17.2193	17.613	MTOR	18.8587	18.7612	18.8099	1.1969	0.0745125	0.949663
Control 13	Luminal B	GAPDH	16.4414	17.3318	16.8866	MTOR	17.855	17.5925	17.7238	0.837181	-0.285204	1.21858
Control 14	Luminal B	GAPDH	16.766	17.129	16.9475	MTOR	17.5491	17.1239	17.3365	0.389046	-0.733339	1.66248
Control 15	Luminal B	GAPDH	16.8373	17.5323	17.1848	MTOR	17.9148	17.6751	17.795	0.610222	-0.512163	1.42619
Control 16	Luminal B	GAPDH	16.0409	16.6404	16.3406	MTOR	17.5909	17.4443	17.5176	1.17697	0.0545837	0.962872
Control 17	Luminal B	GAPDH	16.6514	17.3632	17.0073	MTOR	17.825	17.5925	17.7088	0.701483	-0.420902	1.33876
Control 18	Luminal B	GAPDH	16.8278	16.617	16.7224	MTOR	18.5359	17.4485	17.9922	1.26981	0.14743	0.902857
Control 19	Luminal B	GAPDH	16.8173	17.5373	17.1773	MTOR	17.9148	17.6721	17.7935	0.616222	-0.506163	1.42027
Control 20	Luminal B	GAPDH	16.8878	16.667	16.7774	MTOR	18.5359	17.4345	17.9852	1.2078	0.0854154	0.942513
Control 21	Her2 overexpressing	GAPDH	16.8894	16.5737	16.7316	MTOR	18.2811	18.7362	18.5087	1.7771	0.654716	0.635201
Control 22	Her2 overexpressing	GAPDH	17.3825	16.326	16.8542	MTOR	18.7769	18.3181	18.5475	1.69332	0.570938	0.673179
Control 23	Her2 overexpressing	GAPDH	18.0926	12.9529	15.5228	MTOR	18.3707	19.1228	18.7467	3.22395	2.10156	0.233006
Control 24	Her2 overexpressing	GAPDH	18.1167	17.3293	17.723	MTOR	18.8687	18.8712	18.8699	1.1469	0.0245125	0.983153
Control 25	Her2 overexpressing	GAPDH	17.3815	16.316	16.8487	MTOR	18.777	18.3281	18.5525	1.70383	0.581446	0.668294
Control 26	Her2 overexpressing	GAPDH	16.6375	17.109	16.8732	MTOR	17.4939	17.3259	17.4099	0.536673	-0.585712	1.50078
Control 27	Her2 overexpressing	GAPDH	16.8914	17.3632	17.1273	MTOR	17.795	17.7425	17.7688	0.641491	-0.480894	1.39561
Control 28	Her2 overexpressing	GAPDH	16.6075	17.119	16.8632	MTOR	17.4939	17.3659	17.4299	0.566682	-0.555703	1.46988
Control 29	Her2 overexpressing	GAPDH	16.7368	17.4373	17.087	MTOR	17.9248	17.7431	17.834	0.746961	-0.375424	1.29722
Control 30	Her2 overexpressing	GAPDH	16.0961	16.6204	16.3582	MTOR	17.7609	17.3443	17.5526	1.19436	0.0719786	0.951332
Control 31	Triple negative	GAPDH	16.9078	16.667	16.7874	MTOR	18.4259	17.9385	18.1822	1.39481	0.27242	0.827929
Control 32	Triple negative	GAPDH	16.9894	16.7737	16.8816	MTOR	18.1411	18.6362	18.3887	1.5071	0.384716	0.76593
Control 33	Triple negative	GAPDH	17.2815	17.306	17.2937	MTOR	18.7978	18.0181	18.4079	1.11423	-0.00815396	1.00567
Control 34	Triple negative	GAPDH	18.1926	17.9523	18.0725	MTOR	18.3207	19.1118	18.7162	0.643748	-0.478637	1.39343
Control 35	Triple negative	GAPDH	18.0167	17.2293	17.623	MTOR	18.7887	18.7712	18.7799	1.1569	0.0345125	0.976362
Control 36	Triple negative	GAPDH	16.8378	16.6657	16.7517	MTOR	17.855	17.8423	17.8487	1.09695	-0.0254326	1.01778
Control 37	Triple negative	GAPDH	16.9398	16.6737	16.8068	MTOR	17.5391	17.2959	17.4175	0.61075	-0.511635	1.42567
Control 38	Triple negative	GAPDH	16.8078	16.6557	16.7317	MTOR	17.8532	17.8425	17.8479	1.11615	-0.00623259	1.00433
Control 39	Triple negative	GAPDH	18.1926	17.9529	18.0728	MTOR	18.3407	19.1128	18.7267	0.653948	-0.468437	1.38361
Control 40	Triple negative	GAPDH	17.1727	16.306	16.7393	MTOR	17.9148	17.7521	17.8335	1.09415	-0.0282389	1.01977
Treatment-1	Luminal A	GAPDH	16.7459	17.1137	16.9298	MTOR	17.9398	17.5544	17.7471	0.817295	-0.30509	1.2355
Treatment-2	Luminal A	GAPDH	16.6272	17.2906	16.9589	MTOR	16.2591	15.9366	16.0979	-0.86103	-1.98341	3.95428
Treatment-3	Luminal A	GAPDH	16.6933	16.7469	16.7201	MTOR	16.0708	17.8184	16.9446	0.224496	-0.897889	1.86334
Treatment-4	Luminal A	GAPDH	16.192	16.6262	16.4091	MTOR	16.44	16.6526	16.5463	0.137174	-0.985211	1.9796
Treatment-5	Luminal A	GAPDH	16.8203	16.5953	16.7078	MTOR	16.9527	16.2059	16.5793	-0.128483	-1.25087	2.37985
Treatment-6	Luminal A	GAPDH	16.6953	16.7459	16.7206	MTOR	16.0708	17.8184	16.9446	0.223994	-0.898391	1.86399
Treatment-7	Luminal A	GAPDH	16.191	16.6272	16.4091	MTOR	16.44	16.6525	16.5463	0.137159	-0.985226	1.97962
Treatment-8	Luminal A	GAPDH	16.9203	16.6953	16.8078	MTOR	16.9527	16.2059	16.5793	-0.228483	-1.35087	2.55066
Treatment-9	Luminal A	GAPDH	17.0994	17.191	17.1452	MTOR	17.5815	17.6431	17.6123	0.467118	-0.655267	1.57491
Treatment-10	Luminal A	GAPDH	16.2912	16.1203	16.2058	MTOR	16.8477	16.2543	16.551	0.34521	-0.777175	1.71377
Treatment-11	Luminal B	GAPDH	18.2367	17.0994	17.668	MTOR	17.3211	17.4285	17.3748	-0.293239	-1.41562	2.66775
Treatment-12	Luminal B	GAPDH	18.0518	17.2912	17.6715	MTOR	17.1014	17.6262	17.3638	-0.307689	-1.43007	2.69461
Treatment-13	Luminal B	GAPDH	16.7459	17.1137	16.9298	MTOR	17.8598	17.8744	17.8671	0.937295	-0.18509	1.13689
Treatment-14	Luminal B	GAPDH	16.6277	16.1206	16.3741	MTOR	16.2993	15.3563	15.8278	-0.546306	-1.66869	3.17926
Treatment-15	Luminal B	GAPDH	18.0318	17.2812	17.6565	MTOR	17.1014	17.6262	17.3638	-0.292689	-1.41507	2.66673
Treatment-16	Luminal B	GAPDH	16.6377	16.1406	16.3891	MTOR	16.2991	15.3566	15.8279	-0.56128	-1.68366	3.21243
Treatment-17	Luminal B	GAPDH	16.9213	16.7	16.8106	MTOR	16.6727	16.5922	16.6325	-0.178174	-1.30056	2.46324
Treatment-18	Luminal B	GAPDH	16.6953	16.7459	16.7206	MTOR	16.0908	17.2384	16.6646	-0.0560041	-1.17839	2.26324
Treatment-19	Luminal B	GAPDH	16.191	16.6272	16.4091	MTOR	16.45	16.5267	16.4884	0.0792601	-1.04312	2.06069
Treatment-20	Luminal B	GAPDH	16.9203	16.6953	16.8078	MTOR	16.6727	16.5923	16.6325	-0.175278	-1.29766	2.4583
Treatment-21	Her2 overexpressing	GAPDH	17.0993	17.191	17.1452	MTOR	17.6115	17.6631	17.6373	0.492123	-0.630262	1.54785
Treatment-22	Her2 overexpressing	GAPDH	17.2913	17.9203	17.6058	MTOR	16.8638	16.5743	16.719	-0.88679	-2.00917	4.02552
Treatment-23	Her2 overexpressing	GAPDH	18.2367	17.0994	17.668	MTOR	17.2411	17.8485	17.5448	-0.123239	-1.24562	2.37121
Treatment-24	Her2 overexpressing	GAPDH	17.2912	17.9213	17.6063	MTOR	16.8637	16.5743	16.719	-0.887275	-2.00966	4.02687
Treatment-25	Her2 overexpressing	GAPDH	16.6955	16.7459	16.7207	MTOR	16.3903	17.8391	17.1147	0.39404	-0.728345	1.65674
Treatment-26	Her2 overexpressing	GAPDH	18.0518	17.2912	17.6715	MTOR	17.2121	17.2462	17.2292	-0.442302	-1.56469	2.95813
Treatment-27	Her2 overexpressing	GAPDH	16.7452	17.1137	16.9295	MTOR	17.956	17.4744	17.7152	0.785723	-0.336662	1.26283
Treatment-28	Her2 overexpressing	GAPDH	16.6272	17.2906	16.9589	MTOR	16.2791	15.9566	16.1179	-0.84103	-1.96341	3.89984
Treatment-29	Her2 overexpressing	GAPDH	16.6953	16.7559	16.7256	MTOR	16.3908	17.8384	17.1146	0.388995	-0.73339	1.66254
Treatment-30	Her2 overexpressing	GAPDH	16.191	16.6272	16.4091	MTOR	16.46	16.6725	16.5663	0.15716	-0.965225	1.95237
Treatment-31	Triple negative	GAPDH	16.9203	16.6953	16.8078	MTOR	16.9727	16.2258	16.5993	-0.208525	-1.33091	2.51561
Treatment-32	Triple negative	GAPDH	17.0924	17.191	17.1417	MTOR	17.6015	17.7631	17.6823	0.540618	-0.581767	1.49668
Treatment-33	Triple negative	GAPDH	16.2212	16.3303	16.2758	MTOR	16.8677	16.2743	16.571	0.29521	-0.827175	1.77421
Treatment-34	Triple negative	GAPDH	18.3267	17.0994	17.713	MTOR	17.8411	17.3485	17.5948	-0.118239	-1.24062	2.36301
Treatment-35	Triple negative	GAPDH	18.0518	17.3012	17.6765	MTOR	17.222	17.1362	17.1791	-0.497389	-1.61977	3.07327
Treatment-36	Triple negative	GAPDH	16.9203	16.6953	16.8078	MTOR	17.3411	17.9485	17.6448	0.836982	-0.285403	1.21875
Treatment-37	Triple negative	GAPDH	17.0994	17.191	17.1452	MTOR	17.1214	17.6462	17.3838	0.238608	-0.883777	1.8452
Treatment-38	Triple negative	GAPDH	17.2912	17.9203	17.6058	MTOR	17.9598	17.5744	17.7671	0.161319	-0.961066	1.94675
Treatment-39	Triple negative	GAPDH	18.0528	17.2912	17.672	MTOR	17.2214	17.1462	17.1838	-0.488189	-1.61057	3.05373
Treatment-40	Triple negative	GAPDH	16.9213	16.6453	16.7833	MTOR	16.9727	16.2259	16.5993	-0.183984	-1.30637	2.47318

## Sheet: BARD1
Sample Name		Target Name (Endogenous Control)	Cт Value (Duplicate)		Cт Mean (GAPDH)	Target Name (Gene of Interest)	Cт Value (Duplicate)		Cт Mean (LAG3)	Fold Change Calculation (FC=2^-ΔΔCt)
	Immunochemistry									ΔCt	ΔΔCt	Fold Change					Healthy Tissue	BC Tissue
Control 1	Luminal A	GAPDH	16.6104	16.7459	16.6782	BARD1	18.6978	18.0081	18.3529	1.67478	0.696028	0.617269				AVERAGE	1.08458	2.66474
Control 2	Luminal A	GAPDH	16.657	16.6272	16.6421	BARD1	19.4807	18.1018	18.7912	2.14911	1.17036	0.444311				SD	0.418641	0.669726
Control 3	Luminal A	GAPDH	16.6637	16.6953	16.6795	BARD1	18.8587	16.7612	17.8099	1.13044	0.151682	0.9002				SE	0.132386	0.211786
Control 4	Luminal A	GAPDH	17.296	17.191	17.2435	BARD1	18.9398	18.5544	18.7471	1.50362	0.524864	0.695024				average of delta Ct of Control		0.978755
Control 5	Luminal A	GAPDH	16.6637	16.6953	16.6795	BARD1	18.8587	16.7612	17.8099	1.13044	0.151682	0.9002
Control 6	Luminal A	GAPDH	16.9429	16.9203	16.9316	BARD1	18.2591	17.9366	18.0979	1.16625	0.187491	0.878132
Control 7	Luminal A	GAPDH	17.2193	17.0994	17.1593	BARD1	17.0708	17.8184	17.4446	0.285233	-0.693521	1.61723
Control 8	Luminal A	GAPDH	16.9429	16.9203	16.9316	BARD1	18.2591	17.9366	18.0979	1.16625	0.187491	0.878132
Control 9	Luminal A	GAPDH	17.2193	17.0994	17.1593	BARD1	17.0708	17.8184	17.4446	0.285233	-0.693521	1.61723
Control 10	Luminal A	GAPDH	17.3109	17.2912	17.301	BARD1	17.44	17.8525	17.6463	0.345241	-0.633514	1.55134
Control 11	Luminal B	GAPDH	17.3907	16.2367	16.8137	BARD1	18.9527	17.2059	18.0793	1.2656	0.286847	0.819692
Control 12	Luminal B	GAPDH	16.0968	16.0518	16.0743	BARD1	17.5815	17.7431	17.6623	1.588	0.609249	0.655538
Control 13	Luminal B	GAPDH	17.6737	16.7053	17.1895	BARD1	18.8687	16.4712	17.6699	0.480437	-0.498318	1.41257
Control 14	Luminal B	GAPDH	16.667	16.6372	16.6521	BARD1	19.4907	18.1118	18.8012	2.14911	1.17036	0.444311
Control 15	Luminal B	GAPDH	17.306	17.301	17.3035	BARD1	18.9498	18.5644	18.7571	1.45362	0.474864	0.719534
Control 16	Luminal B	GAPDH	17.6204	17.7559	17.6882	BARD1	18.7078	18.0181	18.3629	0.674783	-0.303972	1.23454
Control 17	Luminal B	GAPDH	16.667	16.6372	16.6521	BARD1	19.4907	18.1118	18.8012	2.14911	1.17036	0.444311
Control 18	Luminal B	GAPDH	17.6737	16.7053	17.1895	BARD1	18.8687	16.4712	17.6699	0.480437	-0.498318	1.41257
Control 19	Luminal B	GAPDH	17.306	17.301	17.3035	BARD1	18.9498	18.5644	18.7571	1.45362	0.474864	0.719534
Control 20	Luminal B	GAPDH	17.9529	16.9303	17.4416	BARD1	18.2691	17.9266	18.0979	0.656245	-0.322509	1.2505
Control 21	Her2 overexpressing	GAPDH	17.2293	17.1094	17.1693	BARD1	17.0818	17.8284	17.4551	0.285733	-0.693021	1.61667
Control 22	Her2 overexpressing	GAPDH	17.3209	17.3012	17.311	BARD1	17.451	17.8625	17.6568	0.345741	-0.633014	1.5508
Control 23	Her2 overexpressing	GAPDH	17.4007	17.2467	17.3237	BARD1	18.9627	17.2159	18.0893	0.765601	-0.213154	1.15922
Control 24	Her2 overexpressing	GAPDH	17.1068	16.0618	16.5843	BARD1	17.5915	17.7531	17.6723	1.088	0.109249	0.92707
Control 25	Her2 overexpressing	GAPDH	17.9529	16.9303	17.4416	BARD1	18.2691	17.9266	18.0979	0.656245	-0.322509	1.2505
Control 26	Her2 overexpressing	GAPDH	17.6737	17.7053	17.6895	BARD1	18.8687	16.7712	17.8199	0.130437	-0.848318	1.8004
Control 27	Her2 overexpressing	GAPDH	17.6204	17.7559	17.6882	BARD1	18.7078	18.0181	18.3629	0.674783	-0.303972	1.23454
Control 28	Her2 overexpressing	GAPDH	16.667	16.6372	16.6521	BARD1	19.4907	18.1118	18.8012	2.14911	1.17036	0.444311
Control 29	Her2 overexpressing	GAPDH	17.6737	17.7053	17.6895	BARD1	18.8687	16.7712	17.8199	0.130437	-0.848318	1.8004
Control 30	Her2 overexpressing	GAPDH	17.306	17.201	17.2535	BARD1	18.9498	18.5644	18.7571	1.50362	0.524864	0.695024
Control 31	Triple negative	GAPDH	16.9529	16.9303	16.9416	BARD1	18.2691	17.9466	18.1079	1.16625	0.187491	0.878132
Control 32	Triple negative	GAPDH	17.2293	17.1094	17.1693	BARD1	17.0808	17.8284	17.4546	0.285233	-0.693521	1.61723
Control 33	Triple negative	GAPDH	17.3209	17.3012	17.311	BARD1	17.35	17.8625	17.6063	0.295241	-0.683514	1.60605
Control 34	Triple negative	GAPDH	17.4007	17.2467	17.3237	BARD1	18.9637	17.2159	18.0898	0.766101	-0.212654	1.15882
Control 35	Triple negative	GAPDH	17.1068	16.0618	16.5843	BARD1	17.5915	17.7531	17.6723	1.088	0.109249	0.92707
Control 36	Triple negative	GAPDH	17.3209	17.3012	17.311	BARD1	17.45	17.8625	17.6563	0.345241	-0.633514	1.55134
Control 37	Triple negative	GAPDH	16.4007	17.2467	16.8237	BARD1	18.9627	17.2159	18.0893	1.2656	0.286846	0.819692
Control 38	Triple negative	GAPDH	17.1068	16.0618	16.5843	BARD1	17.5915	17.7531	17.6723	1.088	0.109249	0.92707
Control 39	Triple negative	GAPDH	17.3209	17.3012	17.311	BARD1	17.45	17.8625	17.6563	0.345241	-0.633514	1.55134
Control 40	Triple negative	GAPDH	16.1068	16.0618	16.0843	BARD1	17.5915	17.7531	17.6723	1.588	0.609249	0.655538
Treatment-1	Luminal A	GAPDH	16.7459	17.5525	17.1492	BARD1	16.0708	17.8184	16.9446	-0.204636	-1.18339	2.2711
Treatment-2	Luminal A	GAPDH	16.6272	16.3059	16.4666	BARD1	16.44	16.6525	16.5463	0.0797102	-0.899045	1.86483
Treatment-3	Luminal A	GAPDH	16.6953	17.65	17.1726	BARD1	16.9527	16.2059	16.5793	-0.593315	-1.57207	2.97331
Treatment-4	Luminal A	GAPDH	17.191	17.2543	17.2227	BARD1	17.5815	17.7431	17.6623	0.439652	-0.539103	1.45307
Treatment-5	Luminal A	GAPDH	17.2912	18.0181	17.6547	BARD1	17.1014	17.6262	17.3638	-0.290866	-1.26962	2.41098
Treatment-6	Luminal A	GAPDH	16.9203	17.9285	17.4244	BARD1	16.8477	16.2543	16.551	-0.873437	-1.85219	3.61048
Treatment-7	Luminal A	GAPDH	16.6953	17.65	17.1726	BARD1	16.9527	16.2059	16.5793	-0.593315	-1.57207	2.97331
Treatment-8	Luminal A	GAPDH	16.9203	17.9285	17.4244	BARD1	16.8477	16.2543	16.551	-0.873437	-1.85219	3.61048
Treatment-9	Luminal A	GAPDH	17.0994	18.6262	17.8628	BARD1	16.3211	16.9285	16.6248	-1.23801	-2.21676	4.64849
Treatment-10	Luminal A	GAPDH	17.2912	18.0181	17.6547	BARD1	17.1014	17.6262	17.3638	-0.290866	-1.26962	2.41098
Treatment-11	Luminal B	GAPDH	18.2367	18.1018	18.1692	BARD1	17.3185	18.0081	17.6633	-0.505901	-1.48466	2.7985
Treatment-12	Luminal B	GAPDH	17.0418	17.7512	17.3965	BARD1	17.7229	16.1018	16.9123	-0.484164	-1.46292	2.75665
Treatment-13	Luminal B	GAPDH	16.7359	17.6423	17.1891	BARD1	16.0608	16.8084	16.4346	-0.754536	-1.73329	3.32485
Treatment-14	Luminal B	GAPDH	16.6172	16.1959	16.4066	BARD1	16.43	17.6425	17.0363	0.629705	-0.34905	1.27372
Treatment-15	Luminal B	GAPDH	17.0418	17.7512	17.3965	BARD1	17.7229	16.1018	16.9123	-0.484164	-1.46292	2.75665
Treatment-16	Luminal B	GAPDH	16.9103	17.9185	17.4144	BARD1	17.8377	16.245	17.0413	-0.373087	-1.35184	2.55238
Treatment-17	Luminal B	GAPDH	17.181	17.2443	17.2127	BARD1	16.5715	16.3331	16.4523	-0.760349	-1.7391	3.33828
Treatment-18	Luminal B	GAPDH	16.6853	17.64	17.1626	BARD1	16.9427	16.1959	16.5693	-0.593315	-1.57207	2.97331
Treatment-19	Luminal B	GAPDH	17.181	17.2443	17.2127	BARD1	16.5715	16.3331	16.4523	-0.760349	-1.7391	3.33828
Treatment-20	Luminal B	GAPDH	16.9103	17.9185	17.4144	BARD1	17.8377	16.245	17.0413	-0.373087	-1.35184	2.55238
Treatment-21	Her2 overexpressing	GAPDH	17.0894	18.6122	17.8508	BARD1	17.3111	16.9185	17.1148	-0.736008	-1.71476	3.28243
Treatment-22	Her2 overexpressing	GAPDH	17.2812	17.9881	17.6347	BARD1	17.0914	17.6162	17.3538	-0.280866	-1.25962	2.39433
Treatment-23	Her2 overexpressing	GAPDH	18.2267	18.1928	18.2097	BARD1	17.3085	17.9981	17.6533	-0.5564	-1.53516	2.8982
Treatment-24	Her2 overexpressing	GAPDH	17.0894	18.6122	17.8508	BARD1	17.3111	16.9185	17.1148	-0.736008	-1.71476	3.28243
Treatment-25	Her2 overexpressing	GAPDH	17.181	17.2443	17.2127	BARD1	17.5715	17.7331	17.6523	0.439651	-0.539104	1.45307
Treatment-26	Her2 overexpressing	GAPDH	17.0418	17.7212	17.3815	BARD1	17.7129	16.0918	16.9023	-0.479164	-1.45792	2.74712
Treatment-27	Her2 overexpressing	GAPDH	16.7359	17.6425	17.1892	BARD1	16.0608	17.8084	16.9346	-0.254636	-1.23339	2.35119
Treatment-28	Her2 overexpressing	GAPDH	16.6172	16.1959	16.4066	BARD1	16.43	16.2425	16.3363	-0.0702798	-1.04903	2.06914
Treatment-29	Her2 overexpressing	GAPDH	16.6853	17.64	17.1626	BARD1	16.9427	17.1959	17.0693	-0.0933103	-1.07207	2.10244
Treatment-30	Her2 overexpressing	GAPDH	17.181	17.2443	17.2127	BARD1	17.5715	17.7331	17.6523	0.439651	-0.539104	1.45307
Treatment-31	Triple negative	GAPDH	16.9103	17.9185	17.4144	BARD1	16.8377	17.0443	16.941	-0.473437	-1.45219	2.73623
Treatment-32	Triple negative	GAPDH	17.0894	18.6162	17.8528	BARD1	17.9111	17.0555	17.4833	-0.369508	-1.34826	2.54605
Treatment-33	Triple negative	GAPDH	17.2812	17.9981	17.6397	BARD1	17.0914	17.6162	17.3538	-0.285866	-1.26462	2.40264
Treatment-34	Triple negative	GAPDH	18.2267	18.1918	18.2092	BARD1	17.3085	17.9982	17.6534	-0.55585	-1.53461	2.89709
Treatment-35	Triple negative	GAPDH	17.0418	17.7512	17.3965	BARD1	17.7129	16.0918	16.9023	-0.494163	-1.47292	2.77583
Treatment-36	Triple negative	GAPDH	17.2812	17.9981	17.6397	BARD1	17.0914	17.6163	17.3538	-0.285841	-1.2646	2.4026
Treatment-37	Triple negative	GAPDH	18.2267	18.0918	18.1592	BARD1	17.3085	17.9981	17.6533	-0.5059	-1.48466	2.7985
Treatment-38	Triple negative	GAPDH	17.0418	17.7512	17.3965	BARD1	17.7129	16.0918	16.9023	-0.494164	-1.47292	2.77583
Treatment-39	Triple negative	GAPDH	18.2267	18.1918	18.2092	BARD1	17.3085	17.9982	17.6534	-0.55585	-1.56469	2.95814
Treatment-40	Triple negative	GAPDH	17.0418	17.7512	17.3965	BARD1	17.7129	16.0918	16.9023	-0.494163	-1.503	2.83432

## Sheet: RAD50
Sample Name		Target Name (Endogenous Control)	Cт Value (Duplicate)		Cт Mean (GAPDH)	Target Name (Gene of Interest)	Cт Value (Duplicate)		Cт Mean (LAG3)	Fold Change Calculation (FC=2^-ΔΔCt)
	Immunochemistry									ΔCt	ΔΔCt	Fold Change					Healthy Tissue	BC Tissue
Control 1	Luminal A	GAPDH	18.1511	18.0081	18.0796	RAD50	17.865	17.6525	17.7588	-0.320841	0.71392	0.609661
Control 2	Luminal A	GAPDH	18.6978	19.1018	18.8998	RAD50	17.4591	17.2059	17.3325	-1.56724	-0.532484	1.44642				AVERAGE	1.06758	2.15294
Control 3	Luminal A	GAPDH	19.4807	18.7612	19.1209	RAD50	17.9048	16.7431	17.324	-1.79694	-0.762181	1.69605				SD	0.363034	0.712701
Control 4	Luminal A	GAPDH	18.8557	18.5544	18.7051	RAD50	17.6609	17.2543	17.4576	-1.24745	-0.212685	1.15884				SE	0.114801	0.225376
Control 5	Luminal A	GAPDH	17.1014	18.6978	17.8996	RAD50	18.2591	17.9366	18.0979	0.198305	1.23307	0.425413				average of delta Ct of Control		-1.03476
Control 6	Luminal A	GAPDH	17.7229	18.8587	18.2908	RAD50	16.44	17.8525	17.1463	-1.1445	-0.109735	1.07903
Control 7	Luminal A	GAPDH	19.4807	18.7612	19.1209	RAD50	17.9048	16.7431	17.324	-1.79694	-0.762181	1.69605
Control 8	Luminal A	GAPDH	18.1511	18.0081	18.0796	RAD50	17.865	17.6525	17.7588	-0.320841	0.71392	0.609661
Control 9	Luminal A	GAPDH	18.3185	19.4807	18.8996	RAD50	17.0708	18.8184	17.9446	-0.955009	0.079751	0.946221
Control 10	Luminal A	GAPDH	17.7229	18.8587	18.2908	RAD50	16.44	17.8525	17.1463	-1.1445	-0.109735	1.07903
Control 11	Luminal B	GAPDH	18.6637	18.9398	18.8017	RAD50	17.44	17.5225	17.4813	-1.32046	-0.285703	1.219
Control 12	Luminal B	GAPDH	18.1691	18.6142	18.3916	RAD50	17.5815	17.7431	17.6623	-0.729325	0.305435	0.809198
Control 13	Luminal B	GAPDH	18.1411	17.9981	18.0696	RAD50	17.865	17.6575	17.7613	-0.308331	0.72643	0.604398
Control 14	Luminal B	GAPDH	18.6878	19.0918	18.8898	RAD50	17.4591	17.2059	17.3325	-1.55723	-0.522469	1.43641
Control 15	Luminal B	GAPDH	18.6637	18.9398	18.8017	RAD50	17.44	17.5225	17.4813	-1.32046	-0.285703	1.219
Control 16	Luminal B	GAPDH	18.1691	18.6142	18.3916	RAD50	17.5815	17.7431	17.6623	-0.729325	0.305435	0.809198
Control 17	Luminal B	GAPDH	18.8587	18.5444	18.7016	RAD50	17.6609	17.2545	17.4577	-1.24385	-0.209085	1.15595
Control 18	Luminal B	GAPDH	19.4707	18.7512	19.1109	RAD50	17.9048	16.7431	17.324	-1.78694	-0.752181	1.68434
Control 19	Luminal B	GAPDH	18.8587	18.5444	18.7016	RAD50	17.6609	17.2545	17.4577	-1.24385	-0.209085	1.15595
Control 20	Luminal B	GAPDH	17.0914	18.6878	17.8896	RAD50	18.2591	17.9366	18.0979	0.208308	1.24307	0.422473
Control 21	Her2 overexpressing	GAPDH	18.3085	19.4707	18.8896	RAD50	17.0708	18.8184	17.9446	-0.945009	0.0897511	0.939685
Control 22	Her2 overexpressing	GAPDH	17.7129	18.8487	18.2808	RAD50	16.44	17.0525	16.7463	-1.5345	-0.499735	1.41395
Control 23	Her2 overexpressing	GAPDH	18.6537	18.9298	18.7917	RAD50	17.4407	17.6525	17.5466	-1.24512	-0.210355	1.15697
Control 24	Her2 overexpressing	GAPDH	18.1591	18.6042	18.3816	RAD50	17.5875	17.7431	17.6653	-0.716325	0.318435	0.801939
Control 25	Her2 overexpressing	GAPDH	18.1411	17.9981	18.0696	RAD50	17.865	17.6525	17.7588	-0.310841	0.72392	0.60545
Control 26	Her2 overexpressing	GAPDH	18.3085	19.4707	18.8896	RAD50	17.0708	18.8184	17.9446	-0.945009	0.0897511	0.939685
Control 27	Her2 overexpressing	GAPDH	18.4487	18.5444	18.4966	RAD50	17.6609	17.255	17.458	-1.0386	-0.00383473	1.00266
Control 28	Her2 overexpressing	GAPDH	18.7878	19.0918	18.9398	RAD50	17.4591	17.206	17.3326	-1.6072	-0.572444	1.48704
Control 29	Her2 overexpressing	GAPDH	19.0707	18.7512	18.9109	RAD50	17.9048	16.7431	17.324	-1.58694	-0.552181	1.4663
Control 30	Her2 overexpressing	GAPDH	18.4487	18.5444	18.4966	RAD50	17.6609	17.255	17.458	-1.0386	-0.00383473	1.00266
Control 31	Triple negative	GAPDH	17.0914	18.6778	17.8846	RAD50	18.2591	17.937	18.098	0.21349	1.24825	0.420958
Control 32	Triple negative	GAPDH	18.3085	19.7707	19.0396	RAD50	17.0708	18.8184	17.9446	-1.09501	-0.060248	1.04264
Control 33	Triple negative	GAPDH	17.9129	18.8487	18.3808	RAD50	16.44	16.8525	16.6463	-1.7345	-0.699735	1.62421
Control 34	Triple negative	GAPDH	18.8537	18.9298	18.8917	RAD50	17.44	17.6525	17.5463	-1.34546	-0.310704	1.24031
Control 35	Triple negative	GAPDH	18.1591	18.5042	18.3316	RAD50	17.5815	17.7431	17.6623	-0.669324	0.365436	0.776234
Control 36	Triple negative	GAPDH	17.7129	18.8487	18.2808	RAD50	16.44	16.8525	16.6463	-1.6345	-0.599735	1.51544
Control 37	Triple negative	GAPDH	18.8537	18.9298	18.8917	RAD50	17.44	17.6525	17.5463	-1.34546	-0.310704	1.24031
Control 38	Triple negative	GAPDH	18.1591	18.6042	18.3816	RAD50	17.5815	17.7431	17.6623	-0.719324	0.315436	0.803608
Control 39	Triple negative	GAPDH	18.6537	18.9298	18.7917	RAD50	17.44	17.6525	17.5463	-1.24546	-0.210703	1.15725
Control 40	Triple negative	GAPDH	18.1591	18.6042	18.3816	RAD50	17.5815	17.7431	17.6623	-0.719324	0.315436	0.803608
Treatment-1	Luminal A	GAPDH	18.2591	17.9366	18.0979	RAD50	15.0708	16.8184	15.9446	-2.15328	-1.11852	2.17125
Treatment-2	Luminal A	GAPDH	18.0708	17.8184	17.9446	RAD50	17.44	16.6525	17.0463	-0.898293	0.136467	0.909744
Treatment-3	Luminal A	GAPDH	17.44	17.6525	17.5463	RAD50	15.9527	14.2059	15.0793	-2.46697	-1.43221	2.69859
Treatment-4	Luminal A	GAPDH	16.9527	17.2059	17.0793	RAD50	14.6953	14.7459	14.7206	-2.35874	-1.32397	2.50355
Treatment-5	Luminal A	GAPDH	17.5815	18.7431	18.1623	RAD50	16.191	16.2316	16.2113	-1.951	-0.916237	1.88719
Treatment-6	Luminal A	GAPDH	18.0708	17.8184	17.9446	RAD50	17.44	16.6525	17.0463	-0.898293	0.136467	0.909744
Treatment-7	Luminal A	GAPDH	17.44	17.6525	17.5463	RAD50	15.9527	14.2059	15.0793	-2.46697	-1.43221	2.69859
Treatment-8	Luminal A	GAPDH	17.3211	17.9285	17.6248	RAD50	14.8477	17.2343	16.041	-1.58381	-0.549051	1.46312
Treatment-9	Luminal A	GAPDH	16.8477	17.2543	17.051	RAD50	15.9203	15.3353	15.6278	-1.42317	-0.38841	1.30895
Treatment-10	Luminal A	GAPDH	17.3211	17.9285	17.6248	RAD50	14.8477	17.2343	16.041	-1.58381	-0.549051	1.46312
Treatment-11	Luminal B	GAPDH	18.1014	19.6262	18.8638	RAD50	15.6142	16.3366	15.9754	-2.88839	-1.85363	3.61408
Treatment-12	Luminal B	GAPDH	17.3185	18.0081	17.6633	RAD50	16.7229	15.2918	16.0073	-1.656	-0.621242	1.5382
Treatment-13	Luminal B	GAPDH	18.2591	17.9366	18.0979	RAD50	15.0708	16.8184	15.9446	-2.15328	-1.11852	2.17125
Treatment-14	Luminal B	GAPDH	18.0708	17.8184	17.9446	RAD50	17.44	17.6525	17.5463	-0.398292	0.636468	0.643286
Treatment-15	Luminal B	GAPDH	17.44	17.6525	17.5463	RAD50	15.9527	14.2059	15.0793	-2.46697	-1.43221	2.69859
Treatment-16	Luminal B	GAPDH	18.2591	17.9366	18.0979	RAD50	15.0708	16.8184	15.9446	-2.15328	-1.11852	2.17125
Treatment-17	Luminal B	GAPDH	16.9527	17.2059	17.0793	RAD50	14.6953	14.7459	14.7206	-2.35874	-1.32397	2.50355
Treatment-18	Luminal B	GAPDH	18.1014	19.6262	18.8638	RAD50	15.6142	16.3366	15.9754	-2.88839	-1.85363	3.61408
Treatment-19	Luminal B	GAPDH	16.9527	17.2059	17.0793	RAD50	14.6953	14.7459	14.7206	-2.35874	-1.32397	2.50355
Treatment-20	Luminal B	GAPDH	17.5815	18.7431	18.1623	RAD50	16.1917	16.3272	16.2595	-1.90283	-0.868069	1.82522
Treatment-21	Her2 overexpressing	GAPDH	16.8477	17.2543	17.051	RAD50	15.0203	15.0353	15.0278	-2.02317	-0.98841	1.984
Treatment-22	Her2 overexpressing	GAPDH	17.3211	17.9285	17.6248	RAD50	14.8477	15.2543	15.051	-2.57381	-1.53905	2.90603
Treatment-23	Her2 overexpressing	GAPDH	18.1014	19.6262	18.8638	RAD50	15.6142	16.9366	16.2754	-2.58839	-1.55363	2.93555
Treatment-24	Her2 overexpressing	GAPDH	17.3185	18.0081	17.6633	RAD50	16.7229	15.0818	15.9023	-1.761	-0.726242	1.65432
Treatment-25	Her2 overexpressing	GAPDH	18.2591	17.9366	18.0979	RAD50	15.0708	16.8184	15.9446	-2.15328	-1.11852	2.17125
Treatment-26	Her2 overexpressing	GAPDH	18.0708	17.8184	17.9446	RAD50	16.44	16.6525	16.5463	-1.39828	-0.363522	1.28656
Treatment-27	Her2 overexpressing	GAPDH	17.44	17.6525	17.5463	RAD50	15.9527	14.2059	15.0793	-2.46696	-1.4322	2.69857
Treatment-28	Her2 overexpressing	GAPDH	16.9527	17.2059	17.0793	RAD50	14.6953	14.7459	14.7206	-2.35873	-1.32397	2.50355
Treatment-29	Her2 overexpressing	GAPDH	17.44	17.6525	17.5463	RAD50	15.9527	14.2059	15.0793	-2.46696	-1.4322	2.69857
Treatment-30	Her2 overexpressing	GAPDH	16.9527	17.2059	17.0793	RAD50	14.6953	14.7459	14.7206	-2.35873	-1.32397	2.50355
Treatment-31	Triple negative	GAPDH	17.5815	18.7431	18.1623	RAD50	15.191	17.6272	16.4091	-1.75318	-0.718419	1.64538
Treatment-32	Triple negative	GAPDH	16.8477	17.2543	17.051	RAD50	15.9203	15.3353	15.6278	-1.42317	-0.388409	1.30895
Treatment-33	Triple negative	GAPDH	17.3211	17.9285	17.6248	RAD50	14.8477	15.2545	15.0511	-2.57371	-1.53895	2.90583
Treatment-34	Triple negative	GAPDH	18.1014	19.6262	18.8638	RAD50	15.6143	16.9366	16.2755	-2.58834	-1.55358	2.93545
Treatment-35	Triple negative	GAPDH	17.3185	18.0081	17.6633	RAD50	16.7229	15.1048	15.9138	-1.7495	-0.714741	1.64119
Treatment-36	Triple negative	GAPDH	17.44	17.6525	17.5463	RAD50	15.9557	15.2059	15.5808	-1.96547	-0.930707	1.90621
Treatment-37	Triple negative	GAPDH	16.9527	17.2059	17.0793	RAD50	14.6853	14.7659	14.7256	-2.35374	-1.31897	2.49489
Treatment-38	Triple negative	GAPDH	17.5815	18.7431	18.1623	RAD50	15.181	16.6272	15.9041	-2.25818	-1.22342	2.33499
Treatment-39	Triple negative	GAPDH	17.3211	17.9285	17.6248	RAD50	14.8477	15.2545	15.0511	-2.57371	-1.54751	2.92312
Treatment-40	Triple negative	GAPDH	16.9527	17.2059	17.0793	RAD50	14.6853	14.7659	14.7256	-2.35374	-1.32753	2.50973

## Sheet: ADIPOQ
Sample Name		Target Name (Endogenous Control)	Cт Value (Duplicate)		Cт Mean (GAPDH)	Target Name (Gene of Interest)	Cт Value (Duplicate)		Cт Mean (LAG3)	Fold Change Calculation (FC=2^-ΔΔCt)
	Immunochemistry									ΔCt	ΔΔCt	Fold Change					Healthy Tissue	BC Tissue	`
Control 1	Luminal A	GAPDH	16.2912	16.296	16.2936	ADIPOQ	16.54	16.5925	16.5663	0.272712	0.2103	0.864357
Control 2	Luminal A	GAPDH	17.6595	17.44	17.5498	ADIPOQ	17.8398	17.5644	17.7021	0.152322	0.0899097	0.939582				AVERAGE	1.02218	5.00912
Control 3	Luminal A	GAPDH	17.8184	17.0708	17.4446	ADIPOQ	17.5591	17.8966	17.7279	0.283284	0.220872	0.858047				SD	0.228832	2.52959
Control 4	Luminal A	GAPDH	17.2059	16.9527	17.0793	ADIPOQ	17.1708	17.7984	17.4846	0.405261	0.342849	0.788483				SE	0.0723629	0.799926
Control 5	Luminal A	GAPDH	17.7459	17.8814	17.8136	ADIPOQ	17.7078	17.8981	17.8029	-0.0106972	-0.0731093	1.05198				average of delta Ct of Control		0.0624121
Control 6	Luminal A	GAPDH	18.0708	17.9184	17.9946	ADIPOQ	17.9807	18.1018	18.0412	0.0466338	-0.0157783	1.011
Control 7	Luminal A	GAPDH	17.8184	17.0708	17.4446	ADIPOQ	17.5591	17.8966	17.7279	0.283284	0.220872	0.858047
Control 8	Luminal A	GAPDH	17.2059	16.9527	17.0793	ADIPOQ	17.1708	17.7984	17.4846	0.405261	0.342849	0.788483
Control 9	Luminal A	GAPDH	17.7459	17.8814	17.8136	ADIPOQ	17.7078	17.8981	17.8029	-0.0106972	-0.0731093	1.05198
Control 10	Luminal A	GAPDH	16.5975	16.6272	16.6124	ADIPOQ	16.3807	17.0181	16.6994	0.0870724	0.0246602	0.983052
Control 11	Luminal B	GAPDH	18.8587	17.7612	18.3099	ADIPOQ	18.5975	17.6272	18.1124	-0.19757	-0.259982	1.19746
Control 12	Luminal B	GAPDH	18.6268	18.7953	18.711	ADIPOQ	17.463	18.9388	18.2009	-0.510137	-0.572549	1.48715
Control 13	Luminal B	GAPDH	16.3912	16.196	16.2936	ADIPOQ	16.44	16.6525	16.5463	0.252717	0.190305	0.87642
Control 14	Luminal B	GAPDH	17.5525	17.31	17.4313	ADIPOQ	17.9498	17.5384	17.7441	0.312823	0.250411	0.840657
Control 15	Luminal B	GAPDH	17.8284	17.2718	17.5501	ADIPOQ	17.2591	17.9426	17.6009	0.0507841	-0.0116281	1.00809
Control 16	Luminal B	GAPDH	18.6268	18.7953	18.711	ADIPOQ	17.463	18.9388	18.2009	-0.510137	-0.572549	1.48715
Control 17	Luminal B	GAPDH	16.3912	16.196	16.2936	ADIPOQ	16.44	16.6525	16.5463	0.252717	0.190305	0.87642
Control 18	Luminal B	GAPDH	17.0059	16.8527	16.9293	ADIPOQ	17.0708	17.8184	17.4446	0.515261	0.452849	0.730599
Control 19	Luminal B	GAPDH	17.0059	16.8527	16.9293	ADIPOQ	17.0708	17.8184	17.4446	0.515261	0.452849	0.730599
Control 20	Luminal B	GAPDH	17.6859	17.8714	17.7786	ADIPOQ	17.6979	17.8881	17.793	0.0143678	-0.0480443	1.03386
Control 21	Her2 overexpressing	GAPDH	18.1708	17.9284	18.0496	ADIPOQ	17.3807	18.1018	17.7412	-0.308366	-0.370778	1.29305
Control 22	Her2 overexpressing	GAPDH	16.6975	16.6372	16.6674	ADIPOQ	16.3907	17.0182	16.7045	0.0371224	-0.0252898	1.01768
Control 23	Her2 overexpressing	GAPDH	18.8687	17.7212	18.2949	ADIPOQ	18.5975	17.6272	18.1124	-0.182569	-0.244981	1.18508
Control 24	Her2 overexpressing	GAPDH	18.7468	18.6853	18.716	ADIPOQ	17.433	18.9488	18.1909	-0.525136	-0.587548	1.50269
Control 25	Her2 overexpressing	GAPDH	16.2912	16.296	16.2936	ADIPOQ	16.44	16.6525	16.5463	0.252692	0.19028	0.876436
Control 26	Her2 overexpressing	GAPDH	17.6525	17.44	17.5463	ADIPOQ	17.9398	17.5544	17.7471	0.200823	0.138411	0.908519
Control 27	Her2 overexpressing	GAPDH	17.9184	17.0708	17.4946	ADIPOQ	17.2591	17.9366	17.5979	0.103284	0.0408719	0.972067
Control 28	Her2 overexpressing	GAPDH	16.2912	16.296	16.2936	ADIPOQ	16.44	16.6525	16.5463	0.252692	0.19028	0.876436
Control 29	Her2 overexpressing	GAPDH	17.6525	17.44	17.5463	ADIPOQ	17.9398	17.5544	17.7471	0.200823	0.138411	0.908519
Control 30	Her2 overexpressing	GAPDH	17.3059	16.8537	17.0798	ADIPOQ	17.1608	17.8484	17.5046	0.424761	0.362349	0.777897
Control 31	Triple negative	GAPDH	17.7458	17.8814	17.8136	ADIPOQ	17.6978	17.8831	17.7904	-0.0231622	-0.0855744	1.06111
Control 32	Triple negative	GAPDH	18.0708	17.9174	17.9941	ADIPOQ	17.9807	18.1028	18.0417	0.0476339	-0.0147782	1.0103
Control 33	Triple negative	GAPDH	16.5975	16.6272	16.6124	ADIPOQ	16.3907	17.0081	16.6994	0.0870724	0.0246602	0.983052
Control 34	Triple negative	GAPDH	18.8587	17.7612	18.3099	ADIPOQ	18.5975	17.6272	18.1124	-0.19757	-0.259982	1.19746
Control 35	Triple negative	GAPDH	18.7268	18.6953	18.711	ADIPOQ	17.333	18.9388	18.1359	-0.575136	-0.637548	1.55568
Control 36	Triple negative	GAPDH	17.8184	17.0707	17.4445	ADIPOQ	17.3591	17.9365	17.6478	0.203284	0.140872	0.906971
Control 37	Triple negative	GAPDH	17.2059	16.9527	17.0793	ADIPOQ	17.1108	17.7184	17.4146	0.335261	0.272849	0.827684
Control 38	Triple negative	GAPDH	18.7268	18.6953	18.711	ADIPOQ	17.333	18.9388	18.1359	-0.575136	-0.637548	1.55568
Control 39	Triple negative	GAPDH	17.8184	17.0707	17.4445	ADIPOQ	17.3591	17.9365	17.6478	0.203284	0.140872	0.906971
Control 40	Triple negative	GAPDH	17.7459	17.8814	17.8136	ADIPOQ	17.6878	17.7881	17.7379	-0.0756972	-0.138109	1.10046
Treatment-1	Luminal A	GAPDH	17.44	17.6525	17.5463	ADIPOQ	15.3211	15.9285	15.6248	-1.9215	-1.98391	3.95565
Treatment-2	Luminal A	GAPDH	17.9527	17.2059	17.5793	ADIPOQ	15.1014	15.6262	15.3638	-2.21552	-2.27793	4.84983
Treatment-3	Luminal A	GAPDH	17.3109	17.2912	17.301	ADIPOQ	14.3185	14.0034	14.161	-3.14008	-3.20249	9.20545
Treatment-4	Luminal A	GAPDH	17.0708	17.8184	17.4446	ADIPOQ	15.7229	16.2018	15.9623	-1.48225	-1.54466	2.91736
Treatment-5	Luminal A	GAPDH	17.44	17.2367	17.3384	ADIPOQ	16.2193	16.8285	16.5239	-0.814458	-0.87687	1.83639
Treatment-6	Luminal A	GAPDH	17.5815	18.7431	18.1623	ADIPOQ	15.3109	16.0262	15.6686	-2.49374	-2.55615	5.88137
Treatment-7	Luminal A	GAPDH	17.9527	17.2059	17.5793	ADIPOQ	15.1014	15.6262	15.3638	-2.21552	-2.27793	4.84983
Treatment-8	Luminal A	GAPDH	17.3907	17.9902	17.6905	ADIPOQ	16.8814	16.7346	16.808	-0.882493	-0.944905	1.92506
Treatment-9	Luminal A	GAPDH	17.44	17.2367	17.3384	ADIPOQ	16.2193	16.8285	16.5239	-0.814458	-0.87687	1.83639
Treatment-10	Luminal A	GAPDH	17.5815	18.7431	18.1623	ADIPOQ	15.3109	16.0262	15.6686	-2.49374	-2.55615	5.88137
Treatment-11	Luminal B	GAPDH	17.8477	17.2543	17.551	ADIPOQ	14.6609	14.2542	14.4576	-3.09341	-3.15582	8.91246
Treatment-12	Luminal B	GAPDH	18.3211	18.9285	18.6248	ADIPOQ	16.2591	16.9364	16.5978	-2.02702	-2.08943	4.25581
Treatment-13	Luminal B	GAPDH	17.44	17.6525	17.5463	ADIPOQ	15.3211	15.9284	15.6248	-1.92153	-1.98394	3.95572
Treatment-14	Luminal B	GAPDH	17.9527	17.2059	17.5793	ADIPOQ	15.1014	15.6262	15.3638	-2.21552	-2.27793	4.84983
Treatment-15	Luminal B	GAPDH	17.3109	17.2912	17.301	ADIPOQ	14.3185	14.2181	14.2683	-3.03272	-3.09513	8.54528
Treatment-16	Luminal B	GAPDH	17.0708	17.8184	17.4446	ADIPOQ	15.7221	16.3118	16.017	-1.42762	-1.49003	2.80896
Treatment-17	Luminal B	GAPDH	17.9527	17.2059	17.5793	ADIPOQ	15.1014	15.6262	15.3638	-2.21552	-2.27793	4.84983
Treatment-18	Luminal B	GAPDH	17.3109	17.2912	17.301	ADIPOQ	14.3185	14.2181	14.2683	-3.03272	-3.09513	8.54528
Treatment-19	Luminal B	GAPDH	17.8477	17.2543	17.551	ADIPOQ	14.6609	14.2542	14.4576	-3.09341	-3.15582	8.91246
Treatment-20	Luminal B	GAPDH	17.3907	17.9902	17.6905	ADIPOQ	16.2414	16.7453	16.4933	-1.19714	-1.25955	2.39421
Treatment-21	Her2 overexpressing	GAPDH	17.44	17.2367	17.3384	ADIPOQ	16.1193	16.0285	16.0739	-1.26446	-1.32687	2.50858
Treatment-22	Her2 overexpressing	GAPDH	17.5815	18.7431	18.1623	ADIPOQ	15.3209	16.6362	15.9786	-2.18374	-2.24615	4.74416
Treatment-23	Her2 overexpressing	GAPDH	17.8477	17.2543	17.551	ADIPOQ	14.6609	14.2543	14.4576	-3.09336	-3.15577	8.91215
Treatment-24	Her2 overexpressing	GAPDH	18.3211	18.9285	18.6248	ADIPOQ	16.2591	16.9366	16.5979	-2.02692	-2.08933	4.25551
Treatment-25	Her2 overexpressing	GAPDH	17.44	17.6525	17.5463	ADIPOQ	15.3211	15.8285	15.5748	-1.9715	-2.03391	4.09515
Treatment-26	Her2 overexpressing	GAPDH	17.9537	17.206	17.5799	ADIPOQ	15.1014	15.6266	15.364	-2.21586	-2.27827	4.85096
Treatment-27	Her2 overexpressing	GAPDH	18.3211	18.9285	18.6248	ADIPOQ	16.2591	16.9366	16.5979	-2.02692	-2.08933	4.25551
Treatment-28	Her2 overexpressing	GAPDH	17.0705	17.8184	17.4444	ADIPOQ	15.6229	16.5018	16.0623	-1.3821	-1.44451	2.72171
Treatment-29	Her2 overexpressing	GAPDH	17.3109	17.3912	17.351	ADIPOQ	14.3185	14.0081	14.1633	-3.18772	-3.25013	9.5145
Treatment-30	Her2 overexpressing	GAPDH	17.0705	17.8184	17.4444	ADIPOQ	15.6229	16.5018	16.0623	-1.3821	-1.44451	2.72171
Treatment-31	Triple negative	GAPDH	17.3907	17.9912	17.691	ADIPOQ	16.8414	16.7859	16.8136	-0.877338	-0.93975	1.9182
Treatment-32	Triple negative	GAPDH	17.42	17.2368	17.3284	ADIPOQ	16.2393	16.9385	16.5889	-0.739508	-0.80192	1.74342
Treatment-33	Triple negative	GAPDH	17.5815	18.7431	18.1623	ADIPOQ	15.3139	16.6262	15.9701	-2.19224	-2.25465	4.77219
Treatment-34	Triple negative	GAPDH	17.8477	17.2542	17.5509	ADIPOQ	14.6609	14.2543	14.4576	-3.09331	-3.15572	8.91184
Treatment-35	Triple negative	GAPDH	18.3212	18.9284	18.6248	ADIPOQ	16.2511	16.5366	16.3939	-2.23095	-2.29336	4.90197
Treatment-36	Triple negative	GAPDH	17.8977	17.3243	17.611	ADIPOQ	14.4609	14.3543	14.4076	-3.20336	-3.26577	9.61824
Treatment-37	Triple negative	GAPDH	18.3511	18.9185	18.6348	ADIPOQ	16.2591	16.3366	16.2979	-2.33692	-2.39933	5.27559
Treatment-38	Triple negative	GAPDH	17.45	17.6535	17.5518	ADIPOQ	15.7211	15.9285	15.8248	-1.727	-1.78941	3.45675
Treatment-39	Triple negative	GAPDH	17.8477	17.2542	17.5509	ADIPOQ	14.6609	14.2543	14.4576	-3.09331	-3.15572	8.91184
Treatment-40	Triple negative	GAPDH	18.3511	18.9185	18.6348	ADIPOQ	16.2591	16.3366	16.2979	-2.33692	-2.39933	5.27559

## Sheet: PMS2
Sample Name		Target Name (Endogenous Control)	Cт Value (Duplicate)		Cт Mean (GAPDH)	Target Name (Gene of Interest)	Cт Value (Duplicate)		Cт Mean (LAG3)	Fold Change Calculation (FC=2^-ΔΔCt)
	Immunochemistry									ΔCt	ΔΔCt	Fold Change					Healthy Tissue	BC Tissue
Control 1	Luminal A	GAPDH	16.7268	16.191	16.4589	PMS2	17.657	18.2912	17.9741	1.51517	0.943652	0.519915
Control 2	Luminal A	GAPDH	18.109	18.4783	18.2936	PMS2	18.6637	18.2367	18.4502	0.156589	-0.414929	1.33323				AVERAGE	1.06949	0.367275
Control 3	Luminal A	GAPDH	16.296	17.2912	16.7936	PMS2	17.296	18.0518	17.6739	0.880299	0.30878	0.807324				SD	0.383742	0.417251
Control 4	Luminal A	GAPDH	18.0708	18.8184	18.4446	PMS2	18.9429	18.2059	18.5744	0.129828	-0.44169	1.35819				SE	0.12135	0.131946
Control 5	Luminal A	GAPDH	17.44	17.6525	17.5463	PMS2	17.2193	19.9285	18.5739	1.02762	0.456104	0.728952				average of delta Ct of Control		0.571518
Control 6	Luminal A	GAPDH	18.9527	18.2059	18.5793	PMS2	18.3109	18.6262	18.4686	-0.110753	-0.682271	1.60466
Control 2	Luminal A	GAPDH	18.109	18.4783	18.2936	PMS2	18.6637	18.2367	18.4502	0.156589	-0.414929	1.33323
Control 3	Luminal A	GAPDH	16.296	17.2912	16.7936	PMS2	17.296	18.0518	17.6739	0.880299	0.30878	0.807324
Control 5	Luminal A	GAPDH	17.44	17.6525	17.5463	PMS2	17.2193	19.9285	18.5739	1.02762	0.456104	0.728952
Control 7	Luminal A	GAPDH	18.8814	16.7459	17.8136	PMS2	18.3907	19.0081	18.6994	0.885799	0.314281	0.804252
Control 8	Luminal B	GAPDH	16.5975	17.6272	17.1124	PMS2	17.44	18.6525	18.0463	0.933919	0.362401	0.777869
Control 9	Luminal B	GAPDH	17.7268	17.6953	17.711	PMS2	17.0861	18.191	17.6385	-0.072484	-0.644002	1.56266
Control 10	Luminal B	GAPDH	16.7368	16.193	16.4649	PMS2	17.656	18.2912	17.9736	1.50867	0.937151	0.522263
Control 11	Luminal B	GAPDH	18.119	18.4723	18.2956	PMS2	18.6647	18.2367	18.4507	0.15508	-0.416439	1.33463
Control 12	Luminal B	GAPDH	16.296	17.2913	16.7936	PMS2	17.295	18.0518	17.6734	0.879753	0.308234	0.80763
Control 10	Luminal B	GAPDH	16.7368	16.193	16.4649	PMS2	17.656	18.2912	17.9736	1.50867	0.937151	0.522263
Control 9	Luminal B	GAPDH	17.7268	17.6953	17.711	PMS2	17.0861	18.191	17.6385	-0.072484	-0.644002	1.56266
Control 11	Luminal B	GAPDH	18.119	18.4723	18.2956	PMS2	18.6647	18.2367	18.4507	0.15508	-0.416439	1.33463
Control 13	Luminal B	GAPDH	18.0808	18.8194	18.4501	PMS2	18.9429	18.2059	18.5744	0.124328	-0.44719	1.36338
Control 14	Luminal B	GAPDH	17.43	17.6626	17.5463	PMS2	17.2193	19.9285	18.5739	1.02759	0.456069	0.72897
Control 15	Her2 overexpressing	GAPDH	18.9627	18.2159	18.5893	PMS2	18.3239	18.6262	18.4751	-0.114253	-0.685772	1.60856
Control 16	Her2 overexpressing	GAPDH	18.8813	16.7459	17.8136	PMS2	18.3907	19.0081	18.6994	0.88585	0.314331	0.804224
Control 17	Her2 overexpressing	GAPDH	16.5875	17.5272	17.0574	PMS2	17.44	18.6525	18.0463	0.988919	0.4174	0.748773
Control 18	Her2 overexpressing	GAPDH	17.7265	17.7953	17.7609	PMS2	17.0861	18.1912	17.6386	-0.122234	-0.693752	1.61749
Control 15	Her2 overexpressing	GAPDH	18.9627	18.2159	18.5893	PMS2	18.3239	18.6262	18.4751	-0.114253	-0.685772	1.60856
Control 20	Her2 overexpressing	GAPDH	18.119	18.4783	18.2986	PMS2	18.6637	18.2367	18.4502	0.151587	-0.419931	1.33786
Control 19	Her2 overexpressing	GAPDH	16.7368	16.191	16.4639	PMS2	17.657	18.2912	17.9741	1.51017	0.938651	0.52172
Control 20	Her2 overexpressing	GAPDH	18.119	18.4783	18.2986	PMS2	18.6637	18.2367	18.4502	0.151587	-0.419931	1.33786
Control 21	Her2 overexpressing	GAPDH	16.296	17.2913	16.7936	PMS2	17.296	18.0518	17.6739	0.880239	0.30872	0.807358
Control 22	Her2 overexpressing	GAPDH	18.0718	18.8183	18.445	PMS2	18.9329	18.2059	18.5694	0.124379	-0.44714	1.36333
Control 23	Triple negative	GAPDH	17.44	17.6525	17.5463	PMS2	17.2192	19.9285	18.5739	1.02758	0.456058	0.728975
Control 24	Triple negative	GAPDH	18.9527	18.2059	18.5793	PMS2	18.3109	18.6263	18.4686	-0.110698	-0.682216	1.6046
Control 25	Triple negative	GAPDH	18.8814	16.7459	17.8136	PMS2	18.3908	19.0181	18.7045	0.890849	0.319331	0.801441
Control 26	Triple negative	GAPDH	16.5975	17.6272	17.1124	PMS2	17.4409	18.6525	18.0467	0.934368	0.362849	0.777627
Control 27	Triple negative	GAPDH	17.7268	17.6953	17.711	PMS2	17.0861	18.191	17.6385	-0.0724845	-0.644003	1.56266
Control 26	Triple negative	GAPDH	16.5975	17.6272	17.1124	PMS2	17.4409	18.6525	18.0467	0.934368	0.362849	0.777627
Control 29	Triple negative	GAPDH	18.0708	18.8184	18.4446	PMS2	18.9429	18.2059	18.5744	0.129833	-0.441685	1.35819
Control 28	Triple negative	GAPDH	16.296	17.2912	16.7936	PMS2	17.296	18.0518	17.6739	0.880299	0.30878	0.807324
Control 29	Triple negative	GAPDH	18.0708	18.8184	18.4446	PMS2	18.9429	18.2059	18.5744	0.129833	-0.441685	1.35819
Control 30	Triple negative	GAPDH	17.44	17.6525	17.5463	PMS2	17.3193	19.9285	18.6239	1.07762	0.506103	0.704122
Treatment-1	Luminal A	GAPDH	18.8587	18.7612	18.8099	PMS2	22.2715	21.2942	21.7828	2.97289	2.40137	0.189285
Treatment-2	Luminal A	GAPDH	18.9398	18.5544	18.7471	PMS2	22.0826	22.2368	22.1597	3.4126	2.84108	0.139556
Treatment-3	Luminal A	GAPDH	18.2591	17.9366	18.0979	PMS2	19.0067	19.0518	19.0293	0.931401	0.359883	0.779228
Treatment-4	Luminal A	GAPDH	17.3211	17.9285	17.6248	PMS2	19.3532	19.4783	19.4157	1.79095	1.21943	0.429452
Treatment-5	Luminal A	GAPDH	17.1014	18.6262	17.8638	PMS2	20.9439	20.9213	20.9326	3.06882	2.4973	0.177107
Treatment-6	Luminal A	GAPDH	17.3185	18.0081	17.6633	PMS2	21.2193	22.0994	21.6593	3.99602	3.4245	0.0931372
Treatment-3	Luminal A	GAPDH	18.2591	17.9366	18.0979	PMS2	19.0067	19.0518	19.0293	0.931401	0.359883	0.779228
Treatment-4	Luminal A	GAPDH	17.3211	17.9285	17.6248	PMS2	19.3532	19.4783	19.4157	1.79095	1.21943	0.429452
Treatment-2	Luminal A	GAPDH	18.9398	18.5544	18.7471	PMS2	22.0826	22.2368	22.1597	3.4126	2.84108	0.139556
Treatment-7	Luminal A	GAPDH	18.7229	19.1018	18.9123	PMS2	18.3907	19.2367	18.8137	-0.0986099	-0.670128	1.59121
Treatment-8	Luminal B	GAPDH	16.6637	16.6953	16.6795	PMS2	20.9398	19.5544	20.2471	3.5676	2.99609	0.12534
Treatment-9	Luminal B	GAPDH	17.296	16.1919	16.7439	PMS2	19.7268	19.6953	19.711	2.96709	2.39557	0.190047
Treatment-10	Luminal B	GAPDH	18.8587	18.7612	18.8099	PMS2	22.2725	21.2914	21.7819	2.97199	2.40047	0.189403
Treatment-11	Luminal B	GAPDH	18.9398	18.5544	18.7471	PMS2	22.0826	22.2367	22.1597	3.41255	2.84103	0.139561
Treatment-12	Luminal B	GAPDH	18.2592	17.9366	18.0979	PMS2	19.0067	19.0518	19.0293	0.931351	0.359833	0.779255
Treatment-14	Luminal B	GAPDH	17.1014	18.6262	17.8638	PMS2	21.9429	20.9203	21.4316	3.56782	2.9963	0.125321
Treatment-10	Luminal B	GAPDH	18.8587	18.7612	18.8099	PMS2	22.2725	21.2914	21.7819	2.97199	2.40047	0.189403
Treatment-11	Luminal B	GAPDH	18.9398	18.5544	18.7471	PMS2	22.0826	22.2367	22.1597	3.41255	2.84103	0.139561
Treatment-13	Luminal B	GAPDH	17.3212	17.9285	17.6248	PMS2	19.3532	19.4783	19.4157	1.7909	1.21938	0.429467
Treatment-14	Luminal B	GAPDH	17.1014	18.6262	17.8638	PMS2	21.9429	20.9203	21.4316	3.56782	2.9963	0.125321
Treatment-15	Her2 overexpressing	GAPDH	17.3185	18.0082	17.6634	PMS2	21.2193	22.0994	21.6593	3.99597	3.42445	0.0931405
Treatment-16	Her2 overexpressing	GAPDH	18.7229	19.1018	18.9123	PMS2	18.3907	19.2367	18.8137	-0.0986099	-0.670128	1.59121
Treatment-17	Her2 overexpressing	GAPDH	16.6637	16.6953	16.6795	PMS2	20.9398	19.5744	20.2571	3.57761	3.00609	0.124474
Treatment-18	Her2 overexpressing	GAPDH	17.296	16.191	16.7435	PMS2	19.7268	19.6953	19.711	2.96754	2.39602	0.189988
Treatment-22	Her2 overexpressing	GAPDH	17.3211	17.9285	17.6248	PMS2	19.3532	19.4783	19.4157	1.79095	1.21943	0.429452
Treatment-17	Her2 overexpressing	GAPDH	16.6637	16.6953	16.6795	PMS2	20.9398	19.5744	20.2571	3.57761	3.00609	0.124474
Treatment-19	Her2 overexpressing	GAPDH	18.8587	18.7612	18.8099	PMS2	22.2715	21.2912	21.7813	2.97139	2.39987	0.189482
Treatment-20	Her2 overexpressing	GAPDH	18.9398	18.5544	18.7471	PMS2	22.0826	22.2367	22.1597	3.41255	2.84103	0.139561
Treatment-21	Her2 overexpressing	GAPDH	18.2591	17.9366	18.0979	PMS2	19.0067	19.0518	19.0293	0.931401	0.359883	0.779228
Treatment-22	Her2 overexpressing	GAPDH	17.3211	17.9285	17.6248	PMS2	19.3532	19.4783	19.4157	1.79095	1.21943	0.429452
Treatment-23	Triple negative	GAPDH	17.1014	18.6262	17.8638	PMS2	20.9429	20.9203	20.9316	3.06782	2.4963	0.17723
Treatment-24	Triple negative	GAPDH	17.3185	18.0081	17.6633	PMS2	21.2193	22.0994	21.6593	3.99602	3.4245	0.0931372
Treatment-25	Triple negative	GAPDH	18.7229	19.1018	18.9123	PMS2	18.3907	19.2367	18.8137	-0.09861	-0.670128	1.59121
Treatment-26	Triple negative	GAPDH	16.6537	16.7953	16.7245	PMS2	20.9398	19.5544	20.2471	3.52261	2.95109	0.129311
Treatment-27	Triple negative	GAPDH	17.316	16.181	16.7485	PMS2	19.7268	19.6953	19.711	2.96254	2.39102	0.190647
Treatment-28	Triple negative	GAPDH	16.6737	16.6943	16.684	PMS2	20.9398	19.5544	20.2471	3.56311	2.99159	0.125731
Treatment-29	Triple negative	GAPDH	17.296	16.191	16.7435	PMS2	19.7268	19.6953	19.711	2.96754	2.39602	0.189988
Treatment-30	Triple negative	GAPDH	18.8487	18.7612	18.8049	PMS2	22.2715	21.2912	21.7813	2.97639	2.40487	0.188826
Treatment-27	Triple negative	GAPDH	17.316	16.181	16.7485	PMS2	19.7268	19.6953	19.711	2.96254	2.35909	0.194914
Treatment-30	Triple negative	GAPDH	18.8487	18.7612	18.8049	PMS2	22.2715	21.2912	21.7813	2.97639	2.37294	0.193052

## Sheet: ARIDB5
Sample Name		Target Name (Endogenous Control)	Cт Value (Duplicate)		Cт Mean (GAPDH)	Target Name (Gene of Interest)	Cт Value (Duplicate)		Cт Mean (LAG3)	Fold Change Calculation (FC=2^-ΔΔCt)
	Immunochemistry									ΔCt	ΔΔCt	Fold Change						Healthy Tissue	BC Tissue
Control 1	Luminal A	GAPDH	18.9122	18.5923	18.7522	ARID5B	18.7146	17.1782	17.9464	-0.80581	-0.846573	1.79822
Control 2	Luminal A	GAPDH	18.1834	18.9508	18.5671	ARID5B	18.1553	18.3484	18.2518	-0.315229	-0.355992	1.27987					AVERAGE	1.1641	0.967445
Control 3	Luminal A	GAPDH	18.5012	18.6217	18.5615	ARID5B	19.6538	19.8494	19.7516	1.19009	1.14933	0.450835					SD	0.587497	0.440853
Control 4	Luminal A	GAPDH	18.2059	18.9527	18.5793	ARID5B	18.104	18.3647	18.2344	-0.34494	-0.385703	1.3065					SE	0.185783	0.13941
Control 5	Luminal A	GAPDH	17.4356	17.0081	17.2219	ARID5B	18.9398	18.5283	18.7341	1.51219	1.47142	0.360626					average of delta Ct of Control		0.0407629
Control 3	Luminal A	GAPDH	18.5012	18.6217	18.5615	ARID5B	19.6538	19.8494	19.7516	1.19009	1.14933	0.450835
Control 4	Luminal A	GAPDH	18.2059	18.9527	18.5793	ARID5B	18.104	18.3647	18.2344	-0.34494	-0.385703	1.3065
Control 7	Luminal A	GAPDH	18.3668	18.2457	18.3062	ARID5B	18.0708	17.5615	17.8161	-0.490119	-0.530882	1.44481
Control 6	Luminal A	GAPDH	18.0708	17.9184	17.9946	ARID5B	18.4236	17.9366	18.1801	0.185531	0.144768	0.904525
Control 7	Luminal A	GAPDH	18.3668	18.2457	18.3062	ARID5B	18.0708	17.5615	17.8161	-0.490119	-0.530882	1.44481
Control 8	Luminal B	GAPDH	17.2104	18.0002	17.6053	ARID5B	18.44	17.6877	18.0638	0.458548	0.417785	0.748573
Control 9	Luminal B	GAPDH	18.1836	18.0894	18.1365	ARID5B	16.9527	17.2259	17.0893	-1.04716	-1.08792	2.12568
Control 10	Luminal B	GAPDH	18.9122	18.5924	18.7523	ARID5B	18.7246	17.1783	17.9515	-0.800805	-0.841568	1.792
Control 11	Luminal B	GAPDH	18.1834	18.431	18.3072	ARID5B	18.1653	18.3484	18.2569	-0.0503242	-0.0910871	1.06517
Control 12	Luminal B	GAPDH	18.5013	18.7217	18.6115	ARID5B	19.6538	19.8494	19.7516	1.14005	1.09928	0.466748
Control 14	Luminal B	GAPDH	17.4356	17.0081	17.2219	ARID5B	18.9398	18.5283	18.7341	1.51219	1.47142	0.360626
Control 10	Luminal B	GAPDH	18.9122	18.5924	18.7523	ARID5B	18.7246	17.1783	17.9515	-0.800805	-0.841568	1.792
Control 9	Luminal B	GAPDH	18.1836	18.0894	18.1365	ARID5B	16.9527	17.2259	17.0893	-1.04716	-1.08792	2.12568
Control 13	Luminal B	GAPDH	18.2059	18.9527	18.5793	ARID5B	18.104	18.3647	18.2344	-0.344945	-0.385708	1.3065
Control 14	Luminal B	GAPDH	17.4356	17.0081	17.2219	ARID5B	18.9398	18.5283	18.7341	1.51219	1.47142	0.360626
Control 15	Her2 overexpressing	GAPDH	18.0778	17.9184	17.9981	ARID5B	18.4236	17.9366	18.1801	0.182031	0.141268	0.906722
Control 16	Her2 overexpressing	GAPDH	18.3668	18.2457	18.3062	ARID5B	18.0708	17.5615	17.8161	-0.490109	-0.530872	1.4448
Control 17	Her2 overexpressing	GAPDH	17.2104	18.0002	17.6053	ARID5B	18.44	17.6877	18.0638	0.458549	0.417786	0.748573
Control 18	Her2 overexpressing	GAPDH	18.1836	18.0893	18.1365	ARID5B	16.9727	17.2159	17.0943	-1.04216	-1.08292	2.11832
Control 19	Her2 overexpressing	GAPDH	18.9322	18.5923	18.7622	ARID5B	18.7346	17.1782	17.9564	-0.8058	-0.846563	1.79821
Control 20	Her2 overexpressing	GAPDH	18.1723	18.4318	18.302	ARID5B	18.2553	18.3476	18.3014	-0.000579134	-0.0413421	1.02907
Control 21	Her2 overexpressing	GAPDH	18.5012	18.7217	18.6115	ARID5B	19.6538	19.8494	19.7516	1.1401	1.09934	0.466731
Control 19	Her2 overexpressing	GAPDH	18.9322	18.5923	18.7622	ARID5B	18.7346	17.1782	17.9564	-0.8058	-0.846563	1.79821
Control 20	Her2 overexpressing	GAPDH	18.1723	18.4318	18.302	ARID5B	18.2553	18.3476	18.3014	-0.000579134	-0.0413421	1.02907
Control 22	Her2 overexpressing	GAPDH	18.2159	18.9529	18.5844	ARID5B	18.1041	18.3647	18.2344	-0.349985	-0.390748	1.31107
Control 23	Triple negative	GAPDH	17.4356	17.0081	17.2219	ARID5B	18.9398	18.5283	18.7341	1.51219	1.47142	0.360626
Control 24	Triple negative	GAPDH	18.0708	17.9184	17.9946	ARID5B	18.4236	17.9366	18.1801	0.185543	0.14478	0.904517
Control 25	Triple negative	GAPDH	18.3668	18.2657	18.3162	ARID5B	18.0708	17.5615	17.8161	-0.500114	-0.540877	1.45486
Control 26	Triple negative	GAPDH	17.2104	18.0012	17.6058	ARID5B	18.44	17.6877	18.0638	0.458045	0.417282	0.748834
Control 27	Triple negative	GAPDH	18.1836	18.0894	18.1365	ARID5B	16.9527	17.2059	17.0793	-1.05716	-1.09792	2.14046
Control 28	Triple negative	GAPDH	18.1834	18.4308	18.3071	ARID5B	18.1553	18.3484	18.2518	-0.0552291	-0.0959921	1.0688
Control 29	Triple negative	GAPDH	18.5012	18.6217	18.5615	ARID5B	19.6537	19.8494	19.7516	1.19008	1.14932	0.450838
Control 27	Triple negative	GAPDH	18.1836	18.0894	18.1365	ARID5B	16.9527	17.2059	17.0793	-1.05716	-1.09792	2.14046
Control 29	Triple negative	GAPDH	18.5012	18.6217	18.5615	ARID5B	19.6537	19.8494	19.7516	1.19008	1.14932	0.450838
Control 30	Triple negative	GAPDH	18.2059	18.9527	18.5793	ARID5B	18.114	18.3647	18.2394	-0.33994	-0.380703	1.30198
Treatment-1	Luminal A	GAPDH	19	18.9686	18.9843	ARID5B	19.3211	19.9285	19.6248	0.640484	0.599721	0.659882
Treatment-2	Luminal A	GAPDH	18.7393	18.9155	18.8274	ARID5B	18.2228	18.2245	18.2237	-0.603686	-0.644449	1.56314
Treatment-3	Luminal A	GAPDH	18.6418	18.4716	18.5567	ARID5B	17.9985	18.0181	18.0083	-0.548409	-0.589172	1.50438
Treatment-4	Luminal A	GAPDH	18.8196	18.3956	18.6076	ARID5B	18.5229	19.1018	18.8123	0.204725	0.163963	0.89257
Treatment-5	Luminal A	GAPDH	17.4326	17.0213	17.2269	ARID5B	17.9922	18.8759	18.434	1.20711	1.16635	0.445548
Treatment-3	Luminal A	GAPDH	18.6418	18.4716	18.5567	ARID5B	17.9985	18.0181	18.0083	-0.548409	-0.589172	1.50438
Treatment-7	Luminal A	GAPDH	17.5815	17.7431	17.6623	ARID5B	19.6418	18.2245	18.9332	1.27088	1.23012	0.426283
Treatment-6	Luminal A	GAPDH	18.4059	18.6687	18.5373	ARID5B	18.6487	18.241	18.4448	-0.0924536	-0.133217	1.09674
Treatment-1	Luminal A	GAPDH	19	18.9686	18.9843	ARID5B	19.3211	19.9285	19.6248	0.640484	0.599721	0.659882
Treatment-7	Luminal A	GAPDH	17.5815	17.7431	17.6623	ARID5B	19.6418	18.2245	18.9332	1.27088	1.23012	0.426283
Treatment-8	Luminal B	GAPDH	18.0528	18.9627	18.5078	ARID5B	19.0093	18.7832	18.8963	0.275482	0.234719	0.849851
Treatment-9	Luminal B	GAPDH	18.9762	18.4782	18.7272	ARID5B	18.0424	18.2156	18.129	-0.598219	-0.638982	1.55723
Treatment-10	Luminal B	GAPDH	19.0001	18.9685	18.9843	ARID5B	19.3211	19.9285	19.6248	0.640439	0.599676	0.659902
Treatment-11	Luminal B	GAPDH	18.7393	18.9155	18.8274	ARID5B	18.2228	18.2245	18.2237	-0.603684	-0.644447	1.56314
Treatment-12	Luminal B	GAPDH	18.6718	18.4726	18.5722	ARID5B	17.9985	18.0181	18.0083	-0.563909	-0.604672	1.52063
Treatment-9	Luminal B	GAPDH	18.9762	18.4782	18.7272	ARID5B	18.0424	18.2156	18.129	-0.598219	-0.638982	1.55723
Treatment-10	Luminal B	GAPDH	19.0001	18.9685	18.9843	ARID5B	19.3211	19.9285	19.6248	0.640439	0.599676	0.659902
Treatment-14	Luminal B	GAPDH	17.4326	17.0233	17.2279	ARID5B	17.9922	18.8759	18.434	1.20611	1.16535	0.445857
Treatment-13	Luminal B	GAPDH	18.8196	18.3956	18.6076	ARID5B	18.5229	19.1018	18.8123	0.204725	0.163962	0.89257
Treatment-14	Luminal B	GAPDH	17.4326	17.0233	17.2279	ARID5B	17.9922	18.8759	18.434	1.20611	1.16535	0.445857
Treatment-15	Her2 overexpressing	GAPDH	18.3959	18.6686	18.5323	ARID5B	18.6487	18.241	18.4448	-0.0874436	-0.128207	1.09293					`
Treatment-16	Her2 overexpressing	GAPDH	17.5714	17.7231	17.6473	ARID5B	19.6418	18.2245	18.9332	1.28593	1.24517	0.421859
Treatment-17	Her2 overexpressing	GAPDH	18.0528	18.9628	18.5078	ARID5B	19.0093	18.7832	18.8963	0.275434	0.234671	0.849879
Treatment-18	Her2 overexpressing	GAPDH	18.9762	18.4782	18.7272	ARID5B	18.0424	18.2156	18.129	-0.598219	-0.638982	1.55723
Treatment-19	Her2 overexpressing	GAPDH	19.0001	18.9687	18.9844	ARID5B	19.3211	19.9285	19.6248	0.640384	0.599621	0.659927
Treatment-17	Her2 overexpressing	GAPDH	18.0528	18.9628	18.5078	ARID5B	19.0093	18.7832	18.8963	0.275434	0.234671	0.849879
Treatment-18	Her2 overexpressing	GAPDH	18.9762	18.4782	18.7272	ARID5B	18.0424	18.2156	18.129	-0.598219	-0.638982	1.55723
Treatment-20	Her2 overexpressing	GAPDH	18.7493	18.9355	18.8424	ARID5B	18.2228	18.2245	18.2237	-0.618686	-0.659449	1.57948
Treatment-21	Her2 overexpressing	GAPDH	18.6438	18.4816	18.5627	ARID5B	17.9985	18.0181	18.0083	-0.554409	-0.595172	1.51065
Treatment-22	Her2 overexpressing	GAPDH	18.8396	18.3966	18.6181	ARID5B	18.5229	19.1018	18.8123	0.194225	0.153463	0.89909
Treatment-23	Triple negative	GAPDH	17.4326	17.0313	17.2319	ARID5B	17.9922	18.8759	18.434	1.20211	1.16135	0.447094
Treatment-24	Triple negative	GAPDH	18.4259	18.6787	18.5523	ARID5B	18.6487	18.241	18.4448	-0.107454	-0.148217	1.1082
Treatment-25	Triple negative	GAPDH	17.5815	17.7631	17.6723	ARID5B	19.6418	18.2245	18.9332	1.26088	1.22012	0.429248
Treatment-28	Triple negative	GAPDH	18.4059	18.7287	18.5673	ARID5B	18.6489	18.241	18.4449	-0.122353	-0.163116	1.1197
Treatment-29	Triple negative	GAPDH	17.5825	17.7432	17.6628	ARID5B	19.6419	18.2247	18.9333	1.27048	1.22972	0.426401
Treatment-26	Triple negative	GAPDH	18.0428	18.9637	18.5033	ARID5B	19.0093	18.7833	18.8963	0.280082	0.239319	0.847145
Treatment-27	Triple negative	GAPDH	18.9862	18.5782	18.7822	ARID5B	18.0427	18.2156	18.1291	-0.653069	-0.693832	1.61757
Treatment-28	Triple negative	GAPDH	18.4059	18.7287	18.5673	ARID5B	18.6489	18.241	18.4449	-0.122353	-0.163116	1.1197
Treatment-29	Triple negative	GAPDH	17.5825	17.7432	17.6628	ARID5B	19.6419	18.2247	18.9333	1.27048	1.22972	0.426401
Treatment-30	Triple negative	GAPDH	18.0528	18.9527	18.5028	ARID5B	19.0093	18.7832	18.8963	0.280482	0.239719	0.84691

## Sheet: NHERF1
Sample Name		Target Name (Endogenous Control)	Cт Value (Duplicate)		Cт Mean (GAPDH)	Target Name (Gene of Interest)	Cт Value (Duplicate)		Cт Mean (LAG3)	Fold Change Calculation (FC=2^-ΔΔCt)
	Immunochemistry									ΔCt	ΔΔCt	Fold Change						Healthy Tissue	BC Tissue
Control 1	Luminal A	GAPDH	17.2956	17.296	17.2958	NHERF1	19.44	20.6525	20.0463	2.75051	0.147549	0.902783
Control 2	Luminal A	GAPDH	18.6555	18.4409	18.5482	NHERF1	20.9398	20.5544	20.7471	2.19887	-0.40409	1.32325					AVERAGE	1.08395	1.20217	0.901655
Control 3	Luminal A	GAPDH	17.8184	17.0708	17.4446	NHERF1	21.2591	20.9366	21.0979	3.65328	1.05032	0.482861					SD	0.438784	0.693128
Control 4	Luminal A	GAPDH	18.2059	18.9527	18.5793	NHERF1	20.0708	21.9184	20.9946	2.41526	-0.187702	1.13895					SE	0.138756	0.219186
Control 5	Luminal A	GAPDH	18.7459	18.8814	18.8136	NHERF1	21.6978	21.7249	21.7113	2.89768	0.294713	0.815235					average of delta Ct of Control		2.60296
Control 6	Luminal A	GAPDH	18.3708	17.9184	18.1446	NHERF1	21.9807	21.1018	21.5412	3.39663	0.793671	0.576874
Control 4	Luminal A	GAPDH	18.2059	18.9527	18.5793	NHERF1	20.0708	21.9184	20.9946	2.41526	-0.187702	1.13895
Control 5	Luminal A	GAPDH	18.7459	18.8814	18.8136	NHERF1	21.6978	21.7249	21.7113	2.89768	0.294713	0.815235
Control 1	Luminal A	GAPDH	17.2956	17.296	17.2958	NHERF1	19.44	20.6525	20.0463	2.75051	0.147549	0.902783
Control 7	Luminal A	GAPDH	18.5976	18.6272	18.6124	NHERF1	21.9907	21.0081	21.4994	2.88703	0.284064	0.821275
Control 8	Luminal B	GAPDH	18.8597	18.7612	18.8104	NHERF1	21.5975	21.6272	21.6124	2.80193	0.198967	0.871174
Control 9	Luminal B	GAPDH	17.7268	17.6953	17.711	NHERF1	20.333	19.9998	20.1664	2.45536	-0.147599	1.10772
Control 10	Luminal B	GAPDH	17.2912	17.296	17.2936	NHERF1	19.4409	20.6525	20.0467	2.75317	0.150205	0.901122
Control 11	Luminal B	GAPDH	18.6575	18.449	18.5533	NHERF1	19.9398	21.5544	20.7471	2.19382	-0.40914	1.32789
Control 12	Luminal B	GAPDH	17.8584	17.0788	17.4686	NHERF1	21.2591	20.9366	21.0979	3.62929	1.02633	0.490959
Control 13	Luminal B	GAPDH	18.2559	18.9527	18.6043	NHERF1	20.0738	21.9184	20.9961	2.39176	-0.211202	1.15765
Control 11	Luminal B	GAPDH	18.6575	18.449	18.5533	NHERF1	19.9398	21.5544	20.7471	2.19382	-0.40914	1.32789
Control 12	Luminal B	GAPDH	17.8584	17.0788	17.4686	NHERF1	21.2591	20.9366	21.0979	3.62929	1.02633	0.490959
Control 14	Luminal B	GAPDH	18.7459	18.8814	18.8136	NHERF1	21.6978	20.7249	21.2113	2.39768	-0.205286	1.15292
Control 14	Luminal B	GAPDH	18.7459	18.8814	18.8136	NHERF1	21.6978	20.7249	21.2113	2.39768	-0.205286	1.15292
Control 15	Her2 overexpressing	GAPDH	18.3798	17.9184	18.1491	NHERF1	19.9897	20.1418	20.0657	1.91663	-0.686329	1.60918
Control 16	Her2 overexpressing	GAPDH	18.5976	18.6278	18.6127	NHERF1	19.3947	21.0081	20.2014	1.58873	-1.01424	2.01983
Control 17	Her2 overexpressing	GAPDH	18.8587	18.77	18.8143	NHERF1	21.5975	21.6272	21.6124	2.79803	0.195071	0.87353
Control 18	Her2 overexpressing	GAPDH	17.7968	17.6953	17.746	NHERF1	19.333	20.9998	20.1664	2.42036	-0.182603	1.13493
Control 19	Her2 overexpressing	GAPDH	17.2992	17.296	17.2976	NHERF1	19.44	20.6545	20.0473	2.74972	0.146754	0.903281
Control 20	Her2 overexpressing	GAPDH	18.6525	18.44	18.5463	NHERF1	19.9398	20.5544	20.2471	1.70082	-0.90214	1.86884
Control 21	Her2 overexpressing	GAPDH	17.8184	17.0708	17.4446	NHERF1	21.2597	20.9366	21.0982	3.65358	1.05062	0.48276
Control 22	Her2 overexpressing	GAPDH	18.2059	18.9528	18.5794	NHERF1	20.0908	21.9284	21.0096	2.43022	-0.172742	1.1272
Control 23	Her2 overexpressing	GAPDH	18.7459	18.8814	18.8136	NHERF1	20.6978	20.7249	20.7113	1.89768	-0.705283	1.63046
Control 24	Her2 overexpressing	GAPDH	18.0798	17.9184	17.9991	NHERF1	19.9877	19.1618	19.5747	1.57563	-1.02733	2.03825
Control 25	Triple negative	GAPDH	18.5975	18.6272	18.6124	NHERF1	20.3977	20.0781	20.2379	1.62557	-0.977393	1.9689
Control 26	Triple negative	GAPDH	18.8587	18.7612	18.8099	NHERF1	19.5975	22.6272	21.1124	2.30243	-0.300533	1.2316
Control 27	Triple negative	GAPDH	17.7968	17.6953	17.746	NHERF1	19.333	22.9998	21.1664	3.42037	0.817405	0.567462
Control 30	Triple negative	GAPDH	18.6595	18.4444	18.552	NHERF1	21.9398	21.5544	21.7471	3.19512	0.592155	0.663351
Control 29	Triple negative	GAPDH	17.292	17.296	17.294	NHERF1	19.4409	20.6525	20.0467	2.75277	0.149804	0.901373
Control 28	Triple negative	GAPDH	17.7968	17.6953	17.746	NHERF1	19.3336	19.9998	19.6667	1.92066	-0.682298	1.60469
Control 28	Triple negative	GAPDH	17.7968	17.6953	17.746	NHERF1	19.3336	19.9998	19.6667	1.92066	-0.682298	1.60469
Control 30	Triple negative	GAPDH	18.6595	18.4444	18.552	NHERF1	21.9398	21.5544	21.7471	3.19512	0.592155	0.663351
Control 29	Triple negative	GAPDH	17.292	17.296	17.294	NHERF1	19.4409	20.6525	20.0467	2.75277	0.149804	0.901373
Control 30	Triple negative	GAPDH	18.6595	18.4444	18.552	NHERF1	21.9398	21.5544	21.7471	3.19512	0.592155	0.663351
Treatment-1	Luminal A	GAPDH	17.449	17.6595	17.5543	NHERF1	19.3211	20.9285	20.1248	2.5705	-0.032465	1.02276
Treatment-2	Luminal A	GAPDH	18.9597	18.2959	18.6278	NHERF1	21.1014	21.6262	21.3638	2.73598	0.133014	0.911924
Treatment-3	Luminal A	GAPDH	18.311	18.2915	18.3012	NHERF1	22.3185	22.0081	22.1633	3.86209	1.25913	0.417797
Treatment-4	Luminal A	GAPDH	18.8708	18.8484	18.8596	NHERF1	21.7229	21.0028	21.3628	2.50325	-0.0997152	1.07156
Treatment-5	Luminal A	GAPDH	18.3997	18.9943	18.697	NHERF1	20.8814	20.7459	20.8136	2.11664	-0.486321	1.40087
Treatment-6	Luminal A	GAPDH	18.44	18.2367	18.3384	NHERF1	21.2193	21.8225	21.5209	3.18254	0.579575	0.669161
Treatment-4	Luminal A	GAPDH	18.8708	18.8484	18.8596	NHERF1	21.7229	21.0028	21.3628	2.50325	-0.0997152	1.07156
Treatment-5	Luminal A	GAPDH	18.3997	18.9943	18.697	NHERF1	20.8814	20.7459	20.8136	2.11664	-0.486321	1.40087
Treatment-1	Luminal A	GAPDH	17.449	17.6595	17.5543	NHERF1	19.3211	20.9285	20.1248	2.5705	-0.032465	1.02276
Treatment-7	Luminal A	GAPDH	18.5815	18.7431	18.6623	NHERF1	19.3109	20.0092	19.6601	0.99776	-1.6052	3.04239
Treatment-8	Luminal B	GAPDH	17.8477	17.2543	17.551	NHERF1	21.6609	21.3232	21.4921	3.77227	1.16931	0.444634
Treatment-9	Luminal B	GAPDH	18.3291	18.9285	18.6288	NHERF1	20.5907	20.3669	20.4788	1.85003	-0.752931	1.68521
Treatment-10	Luminal B	GAPDH	17.84	17.6525	17.7463	NHERF1	19.3211	20.9285	20.1248	2.3785	-0.224465	1.16834
Treatment-11	Luminal B	GAPDH	18.9727	18.2059	18.5893	NHERF1	21.1134	21.6262	21.3698	2.78048	0.177514	0.884225
Treatment-12	Luminal B	GAPDH	18.3909	18.2935	18.3422	NHERF1	22.3186	22.0081	22.1634	3.82118	1.21822	0.429814
Treatment-13	Luminal B	GAPDH	18.9708	18.8184	18.8946	NHERF1	20.7229	20.1068	20.4148	1.52025	-1.08272	2.11802
Treatment-11	Luminal B	GAPDH	18.9727	18.2059	18.5893	NHERF1	21.1134	21.6262	21.3698	2.78048	0.177514	0.884225
Treatment-12	Luminal B	GAPDH	18.3909	18.2935	18.3422	NHERF1	22.3186	22.0081	22.1634	3.82118	1.21822	0.429814
Treatment-9	Luminal B	GAPDH	18.3291	18.9285	18.6288	NHERF1	20.5907	20.3669	20.4788	1.85003	-0.752931	1.68521
Treatment-14	Luminal B	GAPDH	18.3937	18.9943	18.694	NHERF1	20.8814	20.7459	20.8136	2.11962	-0.483341	1.39798
Treatment-15	Her2 overexpressing	GAPDH	18.4404	18.2367	18.3386	NHERF1	19.2193	19.8225	19.5209	1.18235	-1.42062	2.677
Treatment-16	Her2 overexpressing	GAPDH	18.5915	18.7431	18.6673	NHERF1	21.3109	21.0032	21.1571	2.48978	-0.113188	1.08162
Treatment-17	Her2 overexpressing	GAPDH	17.8477	17.2543	17.551	NHERF1	21.6699	21.3233	21.4966	3.77232	1.16936	0.444619
Treatment-18	Her2 overexpressing	GAPDH	18.3291	18.9285	18.6288	NHERF1	20.5907	20.3669	20.4788	1.85003	-0.752932	1.68521
Treatment-21	Her2 overexpressing	GAPDH	18.3109	18.2912	18.301	NHERF1	22.3186	22.0081	22.1634	3.86232	1.25936	0.417729
Treatment-22	Her2 overexpressing	GAPDH	18.0708	18.8184	18.4446	NHERF1	20.7229	20.1968	20.4598	2.01525	-0.587713	1.50286
Treatment-19	Her2 overexpressing	GAPDH	17.4467	17.6525	17.5496	NHERF1	19.3211	20.9285	20.1248	2.57514	-0.0278195	1.01947
Treatment-20	Her2 overexpressing	GAPDH	18.9527	18.206	18.5794	NHERF1	21.1094	21.6262	21.3678	2.78844	0.185474	0.87936
Treatment-21	Her2 overexpressing	GAPDH	18.3109	18.2912	18.301	NHERF1	22.3186	22.0081	22.1634	3.86232	1.25936	0.417729
Treatment-22	Her2 overexpressing	GAPDH	18.0708	18.8184	18.4446	NHERF1	20.7229	20.1968	20.4598	2.01525	-0.587713	1.50286
Treatment-23	Triple negative	GAPDH	18.3907	18.9902	18.6905	NHERF1	19.8814	19.7459	19.8136	1.12316	-1.4798	2.7891
Treatment-24	Triple negative	GAPDH	18.44	18.2367	18.3384	NHERF1	21.2193	21.8225	21.5209	3.18254	0.579579	0.669159
Treatment-25	Triple negative	GAPDH	18.5815	18.7431	18.6623	NHERF1	20.3109	20.0002	20.1556	1.49326	-1.1097	2.15801
Treatment-26	Triple negative	GAPDH	17.8477	17.2543	17.551	NHERF1	21.6609	21.3232	21.4921	3.77228	1.16931	0.444633
Treatment-27	Triple negative	GAPDH	18.3215	18.9485	18.635	NHERF1	20.5907	20.3669	20.4788	1.84383	-0.759129	1.69247
Treatment-28	Triple negative	GAPDH	18.3211	18.9285	18.6248	NHERF1	20.5907	20.3669	20.4788	1.85403	-0.748933	1.68055
Treatment-29	Triple negative	GAPDH	17.44	17.6525	17.5463	NHERF1	19.3211	20.9285	20.1248	2.5785	-0.0244648	1.0171
Treatment-30	Triple negative	GAPDH	18.9527	18.2259	18.5893	NHERF1	22.1013	22.6262	22.3638	3.77447	1.17151	0.443958
Treatment-27	Triple negative	GAPDH	18.3215	18.9485	18.635	NHERF1	20.5907	20.3669	20.4788	1.84383	-0.759129	1.69247
Treatment-28	Triple negative	GAPDH	18.3211	18.9285	18.6248	NHERF1	20.5907	20.3669	20.4788	1.85403	-0.748933	1.68055

## Sheet: SPEN
Sample Name		Target Name (Endogenous Control)	Cт Value (Duplicate)		Cт Mean (GAPDH)	Target Name (Gene of Interest)	Cт Value (Duplicate)		Cт Mean (LAG3)	Fold Change Calculation (FC=2^-ΔΔCt)
	Immunochemistry									ΔCt	ΔΔCt	Fold Change						Healthy Tissue	BC Tissue
Control 1	Luminal A	GAPDH	16.8814	17.3532	17.1173	SPEN	17.865	17.6525	17.7588	0.64149	0.133656	0.911519
Control 2	Luminal A	GAPDH	16.5975	17.109	16.8532	SPEN	17.4591	17.2059	17.3325	0.479283	-0.0285509	1.01999					AVERAGE	1.06788	0.92072
Control 3	Luminal A	GAPDH	18.7268	17.4273	18.077	SPEN	17.9048	17.7431	17.824	-0.253034	-0.760868	1.69451					SD	0.412496	0.894596
Control 4	Luminal A	GAPDH	16.0861	17.6104	16.8482	SPEN	16.6609	16.2543	16.4576	-0.390636	-0.89847	1.86409					SE	0.130443	0.282896
Control 5	Luminal A	GAPDH	17.8978	16.657	17.2774	SPEN	18.5359	17.9285	18.2322	0.954805	0.446972	0.733581					average of delta Ct of Control		0.507834
Control 6	Luminal A	GAPDH	16.8814	17.3532	17.1173	SPEN	17.865	17.6525	17.7588	0.64149	0.133656	0.911519
Control 7	Luminal A	GAPDH	16.5975	17.109	16.8532	SPEN	17.4591	17.2059	17.3325	0.479283	-0.0285509	1.01999
Control 8	Luminal A	GAPDH	17.2715	16.296	16.7837	SPEN	17.6978	18.0081	17.8529	1.06923	0.561397	0.677646
Control 9	Luminal A	GAPDH	16.9794	17.6637	17.3216	SPEN	18.1511	18.6262	18.3887	1.0671	0.559267	0.678647
Control 10	Luminal A	GAPDH	17.2715	16.296	16.7837	SPEN	17.6978	18.0081	17.8529	1.06923	0.561397	0.677646
Control 11	Luminal B	GAPDH	18.0826	18.9429	18.5128	SPEN	18.4807	19.1018	18.7912	0.278448	-0.229386	1.17234
Control 12	Luminal B	GAPDH	18.0067	17.2193	17.613	SPEN	17.8587	18.7624	18.3105	0.697498	0.189664	0.87681
Control 13	Luminal B	GAPDH	16.0863	17.6107	16.8485	SPEN	16.6619	16.2563	16.4591	-0.389386	-0.89722	1.86247
Control 14	Luminal B	GAPDH	17.8938	16.657	17.2754	SPEN	18.5459	17.9287	18.2373	0.961905	0.454072	0.72998
Control 15	Luminal B	GAPDH	18.0826	18.9429	18.5128	SPEN	18.4807	19.1018	18.7912	0.278448	-0.229386	1.17234
Control 16	Luminal B	GAPDH	16.8814	17.3534	17.1174	SPEN	17.865	17.6525	17.7588	0.641391	0.133557	0.911581
Control 17	Luminal B	GAPDH	16.5976	17.109	16.8533	SPEN	17.4592	17.2059	17.3326	0.479282	-0.0285515	1.01999
Control 18	Luminal B	GAPDH	18.7269	17.4273	18.0771	SPEN	17.9048	17.7441	17.8245	-0.252589	-0.760423	1.69399
Control 19	Luminal B	GAPDH	16.0863	17.6107	16.8485	SPEN	16.6619	16.2563	16.4591	-0.389386	-0.89722	1.86247
Control 20	Luminal B	GAPDH	17.8938	16.657	17.2754	SPEN	18.5459	17.9287	18.2373	0.961905	0.454072	0.72998
Control 21	Her2 overexpressing	GAPDH	16.9754	17.6737	17.3246	SPEN	18.1521	18.6262	18.3892	1.0646	0.556767	0.679824
Control 22	Her2 overexpressing	GAPDH	17.2714	16.297	16.7842	SPEN	17.6988	18.0181	17.8584	1.07428	0.566447	0.675278
Control 23	Her2 overexpressing	GAPDH	18.0846	18.9439	18.5143	SPEN	18.4807	19.1018	18.7912	0.276949	-0.230885	1.17355
Control 24	Her2 overexpressing	GAPDH	18.0167	17.2198	17.6183	SPEN	17.8687	18.7612	18.3149	0.696648	0.188814	0.877327
Control 25	Her2 overexpressing	GAPDH	16.0851	17.6104	16.8477	SPEN	16.6609	16.2643	16.4626	-0.385136	-0.89297	1.857
Control 26	Her2 overexpressing	GAPDH	18.0846	18.9439	18.5143	SPEN	18.4807	19.1018	18.7912	0.276949	-0.230885	1.17355
Control 27	Her2 overexpressing	GAPDH	16.8874	17.3532	17.1203	SPEN	17.865	17.6545	17.7598	0.639491	0.131657	0.912782
Control 28	Her2 overexpressing	GAPDH	16.5985	17.109	16.8537	SPEN	17.4591	17.1359	17.2975	0.443782	-0.0640514	1.0454
Control 29	Her2 overexpressing	GAPDH	18.7278	17.4273	18.0775	SPEN	17.9248	17.7432	17.834	-0.243519	-0.751353	1.68337
Control 30	Her2 overexpressing	GAPDH	16.0851	17.6104	16.8477	SPEN	16.6609	16.2643	16.4626	-0.385136	-0.89297	1.857
Control 31	Triple negative	GAPDH	17.8978	16.657	17.2774	SPEN	18.5359	17.9285	18.2322	0.954806	0.446972	0.733581
Control 32	Triple negative	GAPDH	16.9894	17.6637	17.3266	SPEN	18.2511	18.5262	18.3887	1.0621	0.554267	0.681003
Control 33	Triple negative	GAPDH	17.5715	16.006	16.7887	SPEN	17.6977	18.0182	17.8579	1.06923	0.561397	0.677646
Control 34	Triple negative	GAPDH	18.0836	18.9429	18.5133	SPEN	18.4805	19.1028	18.7916	0.278348	-0.229486	1.17242
Control 35	Triple negative	GAPDH	18.0017	17.2193	17.6105	SPEN	17.8487	18.8212	18.3349	0.724398	0.216564	0.860613
Control 36	Triple negative	GAPDH	16.9795	17.6639	17.3217	SPEN	18.1511	18.6262	18.3887	1.06695	0.559117	0.678718
Control 37	Triple negative	GAPDH	17.5715	16.006	16.7887	SPEN	17.6977	18.0182	17.8579	1.06923	0.561397	0.677646
Control 38	Triple negative	GAPDH	18.1726	18.9729	18.5728	SPEN	18.4807	19.1018	18.7912	0.218448	-0.289386	1.22212
Control 39	Triple negative	GAPDH	17.2715	16.296	16.7837	SPEN	17.6928	18.2081	17.9504	1.16673	0.658892	0.633364
Control 40	Triple negative	GAPDH	18.1726	18.9729	18.5728	SPEN	18.4807	19.1018	18.7912	0.218448	-0.289386	1.22212
Treatment-1	Luminal A	GAPDH	16.7459	17.1137	16.9298	SPEN	17.9398	16.6425	17.2912	0.361363	-0.146471	1.10686
Treatment-2	Luminal A	GAPDH	16.6273	17.2906	16.9589	SPEN	17.2491	18.2159	17.7325	0.773562	0.265728	0.831779
Treatment-3	Luminal A	GAPDH	17.6953	17.7459	17.7206	SPEN	19.0208	21.7631	20.392	2.67137	2.16354	0.223209
Treatment-4	Luminal A	GAPDH	18.191	17.6272	17.9091	SPEN	18.444	20.2533	19.3487	1.43954	0.931708	0.524237
Treatment-5	Luminal A	GAPDH	16.9203	16.6953	16.8078	SPEN	18.9527	19.7452	19.349	2.54118	2.03335	0.244287
Treatment-6	Luminal A	GAPDH	16.6273	17.2906	16.9589	SPEN	17.2491	18.2159	17.7325	0.773562	0.265728	0.831779
Treatment-7	Luminal A	GAPDH	17.6953	17.7459	17.7206	SPEN	19.0208	21.7631	20.392	2.67137	2.16354	0.223209
Treatment-8	Luminal A	GAPDH	17.2912	18.9203	18.1058	SPEN	16.8476	17.1915	17.0196	-1.08621	-1.59404	3.01894
Treatment-9	Luminal A	GAPDH	17.0994	17.1912	17.1453	SPEN	18.5882	18.6973	18.6427	1.49743	0.989595	0.503619
Treatment-10	Luminal A	GAPDH	17.2912	18.9203	18.1058	SPEN	16.8476	17.1915	17.0196	-1.08621	-1.59404	3.01894
Treatment-11	Luminal B	GAPDH	18.2367	17.0994	17.668	SPEN	19.3211	20.9204	20.1208	2.45274	1.9449	0.259732
Treatment-12	Luminal B	GAPDH	18.0518	17.2912	17.6715	SPEN	18.1025	17.6264	17.8644	0.192961	-0.314873	1.2439
Treatment-13	Luminal B	GAPDH	16.7458	17.1137	16.9298	SPEN	17.9393	16.6525	17.2959	0.366132	-0.141701	1.10321
Treatment-14	Luminal B	GAPDH	16.6272	17.2806	16.9539	SPEN	17.259	18.2054	17.7322	0.77835	0.270516	0.829023
Treatment-15	Luminal B	GAPDH	16.8903	16.7153	16.8028	SPEN	18.9527	19.7458	19.3493	2.54647	2.03863	0.243394
Treatment-16	Luminal B	GAPDH	18.2367	17.0994	17.668	SPEN	19.3211	20.9204	20.1208	2.45274	1.9449	0.259732
Treatment-17	Luminal B	GAPDH	18.0518	17.2912	17.6715	SPEN	18.1025	17.6264	17.8644	0.192961	-0.314873	1.2439
Treatment-18	Luminal B	GAPDH	17.6953	17.749	17.7221	SPEN	19.0707	21.7456	20.4082	2.68602	2.17819	0.220953
Treatment-19	Luminal B	GAPDH	18.191	17.6272	17.9091	SPEN	18.4401	20.2544	19.3473	1.43813	0.930297	0.52475
Treatment-20	Luminal B	GAPDH	16.8903	16.7153	16.8028	SPEN	18.9527	19.7458	19.3493	2.54647	2.03863	0.243394
Treatment-21	Her2 overexpressing	GAPDH	17.8894	17.201	17.5452	SPEN	18.5814	18.6235	18.6024	1.05726	0.549425	0.683293
Treatment-22	Her2 overexpressing	GAPDH	17.2932	18.8203	18.0568	SPEN	16.8377	17.193	17.0153	-1.04143	-1.54926	2.92667
Treatment-23	Her2 overexpressing	GAPDH	18.4367	17.1993	17.818	SPEN	19.3214	20.9213	20.1213	2.30338	1.79554	0.288063
Treatment-24	Her2 overexpressing	GAPDH	18.0618	17.9912	18.0265	SPEN	18.1013	17.6299	17.8656	-0.160852	-0.668686	1.58962
Treatment-25	Her2 overexpressing	GAPDH	16.7459	17.2137	16.9798	SPEN	17.9398	16.6525	17.2962	0.316343	-0.191491	1.14194
Treatment-26	Her2 overexpressing	GAPDH	16.6372	17.2836	16.9604	SPEN	17.2597	18.2059	17.7328	0.772394	0.26456	0.832452
Treatment-27	Her2 overexpressing	GAPDH	17.2932	18.8203	18.0568	SPEN	16.8377	17.193	17.0153	-1.04143	-1.54926	2.92667
Treatment-28	Her2 overexpressing	GAPDH	18.4367	17.1993	17.818	SPEN	19.3214	20.9213	20.1213	2.30338	1.79554	0.288063
Treatment-29	Her2 overexpressing	GAPDH	17.7053	17.746	17.7256	SPEN	19.0708	21.7431	20.407	2.68132	2.17349	0.221674
Treatment-30	Her2 overexpressing	GAPDH	18.192	17.6292	17.9106	SPEN	18.44	20.2543	19.3472	1.43654	0.928708	0.525329
Treatment-31	Triple negative	GAPDH	16.9233	16.6955	16.8094	SPEN	18.9527	19.7459	19.3493	2.53991	2.03207	0.244503
Treatment-32	Triple negative	GAPDH	17.0995	17.291	17.1952	SPEN	18.5815	18.6953	18.6384	1.44313	0.935295	0.522936
Treatment-33	Triple negative	GAPDH	17.2942	18.9233	18.1088	SPEN	16.8477	17.191	17.0193	-1.08943	-1.59726	3.02568
Treatment-34	Triple negative	GAPDH	18.2367	17.0994	17.668	SPEN	19.3211	20.9203	20.1207	2.45269	1.94485	0.259742
Treatment-35	Triple negative	GAPDH	18.0528	17.2932	17.673	SPEN	18.1014	17.6262	17.8638	0.190811	-0.317023	1.24576
Treatment-36	Triple negative	GAPDH	16.6272	17.2906	16.9589	SPEN	17.2591	18.206	17.7325	0.773642	0.265808	0.831733
Treatment-37	Triple negative	GAPDH	17.6973	17.7489	17.7231	SPEN	19.0702	21.7334	20.4018	2.67875	2.17092	0.222069
Treatment-38	Triple negative	GAPDH	18.291	17.4272	17.8591	SPEN	18.4403	20.2235	19.3319	1.47279	0.964953	0.512295
Treatment-39	Triple negative	GAPDH	16.9233	16.6955	16.8094	SPEN	18.9527	19.7459	19.3493	2.53991	2.03207	0.244503
Treatment-40	Triple negative	GAPDH	18.2367	17.0994	17.668	SPEN	19.3211	20.9203	20.1207	2.45269	1.94485	0.259742

## Sheet: SDHB
Sample Name		Target Name (Endogenous Control)	Cт Value (Duplicate)		Cт Mean (GAPDH)	Target Name (Gene of Interest)	Cт Value (Duplicate)		Cт Mean (LAG3)	Fold Change Calculation (FC=2^-ΔΔCt)
	Immunochemistry									ΔCt	ΔΔCt	Fold Change						Healthy Tissue	BC Tissue
Control 1	Luminal A	GAPDH	16.8814	16.3532	16.6173	SDHB	16.865	17.6525	17.2588	0.64149	0.0171116	0.988209
Control 2	Luminal A	GAPDH	16.5975	16.109	16.3532	SDHB	17.4591	17.2059	17.3325	0.979283	0.354905	0.781921					AVERAGE	1.06345	1.10918
Control 3	Luminal A	GAPDH	18.7268	16.4273	17.577	SDHB	17.9048	17.7431	17.824	0.246966	-0.377413	1.29901					SD	0.401051	0.978342
Control 4	Luminal A	GAPDH	16.0861	17.6104	16.8482	SDHB	16.6609	16.2543	16.4576	-0.390636	-1.01501	2.02092					SE	0.126824	0.309379
Control 5	Luminal A	GAPDH	17.8978	16.657	17.2774	SDHB	16.5359	17.9285	17.2322	-0.0451946	-0.669573	1.5906					average of delta Ct of Control		0.624378
Control 6	Luminal A	GAPDH	16.8814	16.3532	16.6173	SDHB	16.865	17.6525	17.2588	0.64149	0.0171116	0.988209
Control 7	Luminal A	GAPDH	16.5975	16.109	16.3532	SDHB	17.4591	17.2059	17.3325	0.979283	0.354905	0.781921
Control 8	Luminal A	GAPDH	16.9794	17.6637	17.3216	SDHB	18.1511	18.6262	18.3887	1.0671	0.442722	0.735745
Control 9	Luminal A	GAPDH	16.9794	17.6637	17.3216	SDHB	18.1511	18.6262	18.3887	1.0671	0.442722	0.735745
Control 10	Luminal A	GAPDH	17.2715	16.296	16.7837	SDHB	17.6978	18.0081	17.8529	1.06923	0.444853	0.734659
Control 11	Luminal B	GAPDH	18.0826	18.9429	18.5128	SDHB	18.4807	19.1018	18.7912	0.278448	-0.345931	1.27097
Control 12	Luminal B	GAPDH	18.0067	17.2193	17.613	SDHB	17.8587	18.7624	18.3105	0.697498	0.0731192	0.950581
Control 13	Luminal B	GAPDH	16.8814	17.3534	17.1174	SDHB	17.865	17.6525	17.7588	0.641391	0.017013	0.988277
Control 14	Luminal B	GAPDH	16.5976	17.109	16.8533	SDHB	17.4592	17.2059	17.3326	0.479282	-0.145096	1.1058
Control 15	Luminal B	GAPDH	18.0826	18.9429	18.5128	SDHB	18.4807	19.1018	18.7912	0.278448	-0.345931	1.27097
Control 16	Luminal B	GAPDH	18.0067	17.2193	17.613	SDHB	17.8587	18.7624	18.3105	0.697498	0.0731192	0.950581
Control 17	Luminal B	GAPDH	17.8938	16.657	17.2754	SDHB	18.5459	17.9287	18.2373	0.961905	0.337527	0.791397
Control 18	Luminal B	GAPDH	18.7269	17.4273	18.0771	SDHB	17.9048	17.7441	17.8245	-0.252589	-0.876968	1.83651
Control 19	Luminal B	GAPDH	16.0863	17.6107	16.8485	SDHB	16.6619	16.2563	16.4591	-0.389386	-1.01376	2.01917
Control 20	Luminal B	GAPDH	17.8938	16.657	17.2754	SDHB	18.5459	17.9287	18.2373	0.961905	0.337527	0.791397
Control 21	Her2 overexpressing	GAPDH	17.9754	16.6737	17.3246	SDHB	18.1521	18.6262	18.3892	1.0646	0.440222	0.737021
Control 22	Her2 overexpressing	GAPDH	17.2714	16.297	16.7842	SDHB	17.6988	18.0181	17.8584	1.07428	0.449903	0.732092
Control 23	Her2 overexpressing	GAPDH	18.0846	18.9439	18.5143	SDHB	18.4807	19.1018	18.7912	0.276949	-0.34743	1.27229
Control 24	Her2 overexpressing	GAPDH	18.0167	17.2198	17.6183	SDHB	17.8687	18.7612	18.3149	0.696648	0.0722692	0.951141
Control 25	Her2 overexpressing	GAPDH	18.7278	17.4273	18.0775	SDHB	17.9248	17.7432	17.834	-0.243519	-0.867898	1.825
Control 26	Her2 overexpressing	GAPDH	15.0851	15.6104	15.3477	SDHB	16.6609	16.2643	16.4626	1.11486	0.490485	0.711786
Control 27	Her2 overexpressing	GAPDH	16.8874	17.3532	17.1203	SDHB	17.865	17.6545	17.7598	0.639491	0.015113	0.989579
Control 28	Her2 overexpressing	GAPDH	16.5985	17.109	16.8537	SDHB	17.4591	17.1359	17.2975	0.443782	-0.180596	1.13335
Control 29	Her2 overexpressing	GAPDH	18.7278	17.4273	18.0775	SDHB	17.9248	17.7432	17.834	-0.243519	-0.867898	1.825
Control 30	Her2 overexpressing	GAPDH	15.0851	15.6104	15.3477	SDHB	16.6609	16.2643	16.4626	1.11486	0.490485	0.711786
Control 31	Triple negative	GAPDH	17.8978	16.657	17.2774	SDHB	18.5359	17.9285	18.2322	0.954806	0.330428	0.795301
Control 32	Triple negative	GAPDH	16.9894	17.6637	17.3266	SDHB	18.2511	18.5262	18.3887	1.0621	0.437722	0.738299
Control 33	Triple negative	GAPDH	16.5715	16.006	16.2887	SDHB	17.6977	18.0182	17.8579	1.56923	0.944853	0.519483
Control 34	Triple negative	GAPDH	18.0836	18.9429	18.5133	SDHB	18.4805	19.1028	18.7916	0.278348	-0.34603	1.27106
Control 35	Triple negative	GAPDH	17.2715	16.296	16.7837	SDHB	17.6928	18.2081	17.9504	1.16673	0.542348	0.686653
Control 36	Triple negative	GAPDH	18.1726	18.9729	18.5728	SDHB	18.4807	19.1018	18.7912	0.218448	-0.40593	1.32494
Control 37	Triple negative	GAPDH	18.0017	17.2193	17.6105	SDHB	17.8487	18.8212	18.3349	0.724398	0.100019	0.933021
Control 38	Triple negative	GAPDH	16.9795	17.6639	17.3217	SDHB	18.1511	18.6262	18.3887	1.06695	0.442572	0.735821
Control 39	Triple negative	GAPDH	17.2715	16.296	16.7837	SDHB	17.6928	18.2081	17.9504	1.16673	0.542348	0.686653
Control 40	Triple negative	GAPDH	18.1726	18.9729	18.5728	SDHB	18.4807	19.1018	18.7912	0.218448	-0.40593	1.32494
Treatment-1	Luminal A	GAPDH	15.7459	16.1137	15.9298	SDHB	17.9398	15.6425	16.7912	0.861363	0.236985	0.848517
Treatment-2	Luminal A	GAPDH	16.6273	17.2906	16.9589	SDHB	16.2491	16.2159	16.2325	-0.726438	-1.35082	2.55056
Treatment-3	Luminal A	GAPDH	15.7459	16.1137	15.9298	SDHB	17.9398	15.6425	16.7912	0.861363	0.236985	0.848517
Treatment-4	Luminal A	GAPDH	18.191	17.6272	17.9091	SDHB	18.444	18.2533	18.3487	0.439542	-0.184837	1.13669
Treatment-5	Luminal A	GAPDH	16.9203	15.6953	16.3078	SDHB	17.9527	18.7452	18.349	2.04118	1.41681	0.37454
Treatment-6	Luminal A	GAPDH	16.6953	17.7459	17.2206	SDHB	17.0208	17.7631	17.392	0.17137	-0.453008	1.36889
Treatment-7	Luminal A	GAPDH	18.191	17.6272	17.9091	SDHB	18.444	18.2533	18.3487	0.439542	-0.184837	1.13669
Treatment-8	Luminal A	GAPDH	16.9203	15.6953	16.3078	SDHB	17.9527	18.7452	18.349	2.04118	1.41681	0.37454
Treatment-9	Luminal A	GAPDH	17.0994	17.1912	17.1453	SDHB	18.4102	18.3973	18.4037	1.25843	0.63405	0.644365
Treatment-10	Luminal A	GAPDH	17.2912	18.9203	18.1058	SDHB	16.8476	17.1915	17.0196	-1.08621	-1.71059	3.27294
Treatment-11	Luminal B	GAPDH	18.2367	17.0994	17.668	SDHB	19.3211	20.9204	20.1208	2.45274	1.82836	0.281585
Treatment-12	Luminal B	GAPDH	18.0518	17.2912	17.6715	SDHB	18.1025	17.6264	17.8644	0.192961	-0.431417	1.34856
Treatment-13	Luminal B	GAPDH	16.7458	17.1137	16.9298	SDHB	17.9393	16.6525	17.2959	0.366132	-0.258246	1.19602
Treatment-14	Luminal B	GAPDH	16.6272	17.2806	16.9539	SDHB	17.259	18.2054	17.7322	0.77835	0.153971	0.898773
Treatment-15	Luminal B	GAPDH	17.6953	17.749	17.7221	SDHB	19.0707	21.7456	20.4082	2.68602	2.06165	0.239543
Treatment-16	Luminal B	GAPDH	16.8903	16.7153	16.8028	SDHB	18.9527	19.7458	19.3493	2.54647	1.92209	0.263872
Treatment-17	Luminal B	GAPDH	18.2367	17.0994	17.668	SDHB	19.3211	20.9204	20.1208	2.45274	1.82836	0.281585
Treatment-18	Luminal B	GAPDH	18.0518	17.2912	17.6715	SDHB	18.1025	17.6264	17.8644	0.192961	-0.431417	1.34856
Treatment-19	Luminal B	GAPDH	18.191	17.6272	17.9091	SDHB	18.4401	20.2544	19.3473	1.43813	0.813753	0.5689
Treatment-20	Luminal B	GAPDH	16.8903	16.7153	16.8028	SDHB	18.9527	19.7458	19.3493	2.54647	1.92209	0.263872
Treatment-21	Her2 overexpressing	GAPDH	17.8894	17.201	17.5452	SDHB	17.5814	17.6235	17.6024	0.0572584	-0.56712	1.48156
Treatment-22	Her2 overexpressing	GAPDH	17.2932	18.8203	18.0568	SDHB	16.8377	16.193	16.5153	-1.54143	-2.16581	4.48717
Treatment-23	Her2 overexpressing	GAPDH	18.4367	17.1993	17.818	SDHB	17.3214	17.9213	17.6213	-0.196625	-0.821003	1.76663
Treatment-24	Her2 overexpressing	GAPDH	18.0618	17.9912	18.0265	SDHB	17.1013	17.6299	17.3656	-0.660852	-1.28523	2.43721
Treatment-25	Her2 overexpressing	GAPDH	16.7459	17.2137	16.9798	SDHB	17.9398	16.6525	17.2962	0.316343	-0.308036	1.23802
Treatment-26	Her2 overexpressing	GAPDH	16.6372	17.2836	16.9604	SDHB	17.2597	18.2059	17.7328	0.772394	0.148016	0.902491
Treatment-27	Her2 overexpressing	GAPDH	18.4367	17.1993	17.818	SDHB	17.3214	17.9213	17.6213	-0.196625	-0.821003	1.76663
Treatment-28	Her2 overexpressing	GAPDH	18.192	17.6292	17.9106	SDHB	18.44	20.2543	19.3472	1.43654	0.812163	0.569527
Treatment-29	Her2 overexpressing	GAPDH	17.7053	17.746	17.7256	SDHB	19.0708	21.7431	20.407	2.68132	2.05694	0.240325
Treatment-30	Her2 overexpressing	GAPDH	18.192	17.6292	17.9106	SDHB	18.44	20.2543	19.3472	1.43654	0.812163	0.569527
Treatment-31	Triple negative	GAPDH	16.9233	16.6955	16.8094	SDHB	18.9527	19.7459	19.3493	2.53991	1.91553	0.265074
Treatment-32	Triple negative	GAPDH	17.0995	17.291	17.1952	SDHB	18.5815	18.6953	18.6384	1.44313	0.81875	0.566933
Treatment-33	Triple negative	GAPDH	17.2942	18.9233	18.1088	SDHB	16.8477	17.191	17.0193	-1.08943	-1.71381	3.28025
Treatment-34	Triple negative	GAPDH	18.2367	17.0994	17.668	SDHB	19.3211	20.9203	20.1207	2.45269	1.82831	0.281595
Treatment-35	Triple negative	GAPDH	18.0528	17.2932	17.673	SDHB	18.1014	17.6262	17.8638	0.190811	-0.433568	1.35057
Treatment-36	Triple negative	GAPDH	16.6272	17.2906	16.9589	SDHB	17.2591	18.206	17.7325	0.773642	0.149263	0.901711
Treatment-37	Triple negative	GAPDH	17.6973	17.7489	17.7231	SDHB	19.0702	21.7334	20.4018	2.67875	2.05438	0.240753
Treatment-38	Triple negative	GAPDH	18.291	17.4272	17.8591	SDHB	18.4403	20.2235	19.3319	1.47279	0.848408	0.555397
Treatment-39	Triple negative	GAPDH	18.0528	17.2932	17.673	SDHB	18.1014	17.6262	17.8638	0.190811	-0.433568	1.35057
Treatment-40	Triple negative	GAPDH	16.6272	17.2906	16.9589	SDHB	17.2591	18.206	17.7325	0.773642	0.149263	0.901711

## Sheet: MYH10
Sample Name		Target Name (Endogenous Control)	Cт Value (Duplicate)		Cт Mean (GAPDH)	Target Name (Gene of Interest)	Cт Value (Duplicate)		Cт Mean (LAG3)	Fold Change Calculation (FC=2^-ΔΔCt)
	Immunochemistry									ΔCt	ΔΔCt	Fold Change						Healthy Tissue	BC Tissue
Control 1	Luminal A	GAPDH	16.7268	16.191	16.4589	MHY10	18.657	18.2912	18.4741	2.01517	1.43698	0.369339
Control 2	Luminal A	GAPDH	18.109	18.4783	18.2936	MHY10	19.6637	19.2367	19.4502	1.15659	0.578401	0.669706					AVERAGE	1.10068	0.536708
Control 3	Luminal A	GAPDH	16.296	17.2912	16.7936	MHY10	18.296	17.0518	17.6739	0.880299	0.30211	0.811065					SD	0.492693	0.531177
Control 4	Luminal A	GAPDH	18.0708	18.8184	18.4446	MHY10	17.9429	17.2059	17.5744	-0.870172	-1.44836	2.72898					SE	0.155803	0.167973
Control 5	Luminal A	GAPDH	18.44	17.6525	18.0463	MHY10	18.2193	18.9285	18.5739	0.527623	-0.0505656	1.03567					average of delta Ct of Control		0.578188
Control 6	Luminal A	GAPDH	16.7268	16.191	16.4589	MHY10	18.657	18.2912	18.4741	2.01517	1.43698	0.369339
Control 7	Luminal A	GAPDH	18.109	18.4783	18.2936	MHY10	19.6637	19.2367	19.4502	1.15659	0.578401	0.669706
Control 8	Luminal A	GAPDH	18.8814	16.7459	17.8136	MHY10	18.3907	18.1181	18.2544	0.440799	-0.137389	1.09991
Control 9	Luminal A	GAPDH	18.9527	18.2059	18.5793	MHY10	18.3109	18.6262	18.4686	-0.110753	-0.688941	1.6121
Control 10	Luminal A	GAPDH	18.8814	16.7459	17.8136	MHY10	18.3907	18.1181	18.2544	0.440799	-0.137389	1.09991
Control 11	Luminal B	GAPDH	16.5975	17.6272	17.1124	MHY10	18.44	18.3525	18.3963	1.28392	0.705731	0.613132
Control 12	Luminal B	GAPDH	17.7268	17.6953	17.711	MHY10	17.0861	18.191	17.6385	-0.072484	-0.650672	1.5699
Control 15	Luminal B	GAPDH	17.7268	17.6953	17.711	MHY10	17.0861	18.191	17.6385	-0.072484	-0.650672	1.5699
Control 16	Luminal B	GAPDH	17.7368	17.193	17.4649	MHY10	18.656	18.2912	18.4736	1.00867	0.430482	0.742014
Control 13	Luminal B	GAPDH	17.7368	17.193	17.4649	MHY10	18.656	18.2912	18.4736	1.00867	0.430482	0.742014
Control 14	Luminal B	GAPDH	18.119	18.4723	18.2956	MHY10	18.6647	18.2367	18.4507	0.15508	-0.423109	1.34081
Control 17	Luminal B	GAPDH	18.0808	18.8194	18.4501	MHY10	18.9429	18.2059	18.5744	0.124328	-0.45386	1.3697
Control 18	Luminal B	GAPDH	16.296	17.2913	16.7936	MHY10	17.995	18.0518	18.0234	1.22975	0.651564	0.63659
Control 19	Luminal B	GAPDH	18.0808	18.8194	18.4501	MHY10	18.9429	18.2059	18.5744	0.124328	-0.45386	1.3697
Control 20	Luminal B	GAPDH	17.43	17.6626	17.5463	MHY10	17.2193	19.9285	18.5739	1.02759	0.449399	0.732348
Control 21	Her2 overexpressing	GAPDH	17.9627	17.2159	17.5893	MHY10	18.3239	18.6262	18.4751	0.885747	0.307559	0.808008
Control 22	Her2 overexpressing	GAPDH	18.8813	16.7459	17.8136	MHY10	18.3907	19.0081	18.6994	0.88585	0.307662	0.80795
Control 23	Her2 overexpressing	GAPDH	16.5875	17.5272	17.0574	MHY10	17.44	18.6525	18.0463	0.988919	0.41073	0.752242
Control 24	Her2 overexpressing	GAPDH	17.7265	17.7953	17.7609	MHY10	19.0861	18.1912	18.6386	0.877766	0.299578	0.81249
Control 25	Her2 overexpressing	GAPDH	18.119	18.4783	18.2986	MHY10	18.6637	18.2367	18.4502	0.151587	-0.426601	1.34406
Control 26	Her2 overexpressing	GAPDH	18.296	18.2913	18.2936	MHY10	18.296	18.0518	18.1739	-0.119761	-0.69795	1.6222
Control 27	Her2 overexpressing	GAPDH	18.7368	16.191	17.4639	MHY10	19.657	18.2912	18.9741	1.51017	0.931982	0.524138
Control 28	Her2 overexpressing	GAPDH	18.119	18.4783	18.2986	MHY10	18.6637	18.2367	18.4502	0.151587	-0.426601	1.34406
Control 29	Her2 overexpressing	GAPDH	18.296	18.2913	18.2936	MHY10	18.296	18.0518	18.1739	-0.119761	-0.69795	1.6222
Control 30	Her2 overexpressing	GAPDH	18.0718	18.8183	18.445	MHY10	18.9329	18.2059	18.5694	0.124379	-0.45381	1.36965
Control 31	Triple negative	GAPDH	19.44	18.6525	19.0463	MHY10	17.2192	19.9285	18.5739	-0.472424	-1.05061	2.07141
Control 32	Triple negative	GAPDH	18.9527	18.2059	18.5793	MHY10	18.3109	18.6263	18.4686	-0.110698	-0.688886	1.61204
Control 33	Triple negative	GAPDH	18.8814	16.7459	17.8136	MHY10	18.3908	19.0181	18.7045	0.890849	0.312661	0.805155
Control 34	Triple negative	GAPDH	16.5975	17.6272	17.1124	MHY10	17.4409	18.6525	18.0467	0.934368	0.356179	0.781231
Control 35	Triple negative	GAPDH	17.7268	17.6953	17.711	MHY10	17.0861	18.191	17.6385	-0.0724845	-0.650673	1.5699
Control 36	Triple negative	GAPDH	16.5975	17.6272	17.1124	MHY10	17.4409	18.6525	18.0467	0.934368	0.356179	0.781231
Control 37	Triple negative	GAPDH	18.0708	18.8184	18.4446	MHY10	18.9429	18.2059	18.5744	0.129833	-0.448355	1.36448
Control 38	Triple negative	GAPDH	16.296	17.2912	16.7936	MHY10	17.296	18.0518	17.6739	0.880299	0.30211	0.811065
Control 39	Triple negative	GAPDH	18.0708	18.8184	18.4446	MHY10	18.9429	18.2059	18.5744	0.129833	-0.448355	1.36448
Control 40	Triple negative	GAPDH	17.44	17.6525	17.5463	MHY10	17.3193	19.9285	18.6239	1.07762	0.499433	0.707385
Treatment-1	Luminal A	GAPDH	17.8587	17.7612	17.8099	MHY10	19.2715	19.2942	19.2828	1.47289	0.894699	0.537859
Treatment-2	Luminal A	GAPDH	18.9398	18.5544	18.7471	MHY10	18.0826	18.2368	18.1597	-0.587398	-1.16559	2.24324
Treatment-3	Luminal A	GAPDH	17.8587	17.7612	17.8099	MHY10	19.2715	19.2942	19.2828	1.47289	0.894699	0.537859
Treatment-4	Luminal A	GAPDH	17.3211	17.9285	17.6248	MHY10	18.3532	18.3783	18.3657	0.740949	0.162761	0.893314
Treatment-5	Luminal A	GAPDH	17.1014	18.6262	17.8638	MHY10	19.9439	19.9213	19.9326	2.06882	1.49063	0.355856
Treatment-6	Luminal A	GAPDH	18.2591	17.9366	18.0979	MHY10	18.0067	18.1518	18.0793	-0.0185988	-0.596787	1.51234
Treatment-7	Luminal A	GAPDH	17.3211	17.9285	17.6248	MHY10	18.3532	18.3783	18.3657	0.740949	0.162761	0.893314
Treatment-8	Luminal A	GAPDH	17.1014	18.6262	17.8638	MHY10	19.9439	19.9213	19.9326	2.06882	1.49063	0.355856
Treatment-9	Luminal A	GAPDH	17.3185	18.0081	17.6633	MHY10	19.2193	19.0994	19.1593	1.49602	0.917829	0.529305
Treatment-10	Luminal A	GAPDH	18.7229	19.1018	18.9123	MHY10	18.3907	19.2367	18.8137	-0.0986099	-0.676798	1.59859
Treatment-11	Luminal B	GAPDH	16.6637	16.6953	16.6795	MHY10	20.9398	19.5544	20.2471	3.5676	2.98942	0.12592
Treatment-12	Luminal B	GAPDH	17.296	16.1919	16.7439	MHY10	19.7268	19.6953	19.711	2.96709	2.3889	0.190928
Treatment-13	Luminal B	GAPDH	18.8587	18.7612	18.8099	MHY10	21.2725	21.2914	21.2819	2.47199	1.8938	0.269098
Treatment-14	Luminal B	GAPDH	18.2592	17.9366	18.0979	MHY10	19.0067	19.0518	19.0293	0.931351	0.353163	0.782866
Treatment-15	Luminal B	GAPDH	17.3212	17.9285	17.6248	MHY10	19.3532	19.4783	19.4157	1.7909	1.21271	0.431457
Treatment-16	Luminal B	GAPDH	17.296	16.1919	16.7439	MHY10	19.7268	19.6953	19.711	2.96709	2.3889	0.190928
Treatment-17	Luminal B	GAPDH	18.9398	18.5544	18.7471	MHY10	22.0826	22.2367	22.1597	3.41255	2.83436	0.140208
Treatment-18	Luminal B	GAPDH	18.2592	17.9366	18.0979	MHY10	19.0067	19.0518	19.0293	0.931351	0.353163	0.782866
Treatment-19	Luminal B	GAPDH	17.3212	17.9285	17.6248	MHY10	19.3532	19.4783	19.4157	1.7909	1.21271	0.431457
Treatment-20	Luminal B	GAPDH	17.1014	18.6262	17.8638	MHY10	21.9429	20.9203	21.4316	3.56782	2.98963	0.125901
Treatment-21	Her2 overexpressing	GAPDH	17.3185	18.0082	17.6634	MHY10	21.2193	22.0994	21.6593	3.99597	3.41778	0.0935721
Treatment-22	Her2 overexpressing	GAPDH	18.7229	19.1018	18.9123	MHY10	18.3907	19.2367	18.8137	-0.0986099	-0.676798	1.59859
Treatment-23	Her2 overexpressing	GAPDH	16.6637	16.6953	16.6795	MHY10	20.9398	19.5744	20.2571	3.57761	2.99942	0.12505
Treatment-24	Her2 overexpressing	GAPDH	17.296	16.191	16.7435	MHY10	19.7268	19.6953	19.711	2.96754	2.38935	0.190868
Treatment-25	Her2 overexpressing	GAPDH	18.8587	18.7612	18.8099	MHY10	22.2715	21.2912	21.7813	2.97139	2.3932	0.19036
Treatment-26	Her2 overexpressing	GAPDH	18.2591	17.9366	18.0979	MHY10	19.0067	19.0518	19.0293	0.931401	0.353213	0.782839
Treatment-27	Her2 overexpressing	GAPDH	17.3211	17.9285	17.6248	MHY10	19.3532	19.4783	19.4157	1.79095	1.21276	0.431442
Treatment-28	Her2 overexpressing	GAPDH	18.9398	18.5544	18.7471	MHY10	22.0826	22.2367	22.1597	3.41255	2.83436	0.140208
Treatment-29	Her2 overexpressing	GAPDH	18.2591	17.9366	18.0979	MHY10	19.0067	19.0518	19.0293	0.931401	0.353213	0.782839
Treatment-30	Her2 overexpressing	GAPDH	17.3211	17.9285	17.6248	MHY10	19.3532	19.4783	19.4157	1.79095	1.21276	0.431442
Treatment-31	Triple negative	GAPDH	17.1014	18.6262	17.8638	MHY10	20.9429	20.9203	20.9316	3.06782	2.48963	0.178051
Treatment-32	Triple negative	GAPDH	17.3185	18.0081	17.6633	MHY10	21.2193	22.0994	21.6593	3.99602	3.41783	0.0935688
Treatment-33	Triple negative	GAPDH	18.7229	19.1018	18.9123	MHY10	18.3907	19.2367	18.8137	-0.09861	-0.676798	1.59859
Treatment-34	Triple negative	GAPDH	16.6537	16.7953	16.7245	MHY10	20.9398	19.5544	20.2471	3.52261	2.94442	0.12991
Treatment-35	Triple negative	GAPDH	17.316	16.181	16.7485	MHY10	19.7268	19.6953	19.711	2.96254	2.38435	0.191531
Treatment-36	Triple negative	GAPDH	16.6737	16.6943	16.684	MHY10	20.9398	19.5544	20.2471	3.56311	2.98492	0.126314
Treatment-37	Triple negative	GAPDH	17.296	16.191	16.7435	MHY10	19.7268	19.6953	19.711	2.96754	2.38935	0.190868
Treatment-38	Triple negative	GAPDH	18.8487	18.7612	18.8049	MHY10	22.2715	21.2912	21.7813	2.97639	2.3982	0.189701
Treatment-39	Triple negative	GAPDH	17.316	16.181	16.7485	MHY10	19.7268	19.6953	19.711	2.96254	2.38435	0.191531
Treatment-40	Triple negative	GAPDH	16.6737	16.6943	16.684	MHY10	20.9398	19.5544	20.2471	3.56311	2.98492	0.126314

[truncated: 1 more sheets: APC]
